1 **Fgfr2b signaling is essential for the maintenance of the alveolar epithelial type**  
2 **2 lineage during lung homeostasis in mice**

3  
4  
5 Negah Ahmadvand<sup>1</sup>, Arun Lingampally<sup>1</sup>, Farhad Khosravi<sup>2</sup>, Ivonne Vazquez-  
6 Armendariz<sup>3</sup>, Stefano Rivetti<sup>1</sup>, Jochen Wilhelm<sup>1,3</sup>, Susanne Herold<sup>1</sup>, Guillermo  
7 Barreto<sup>4</sup>, Janine Koepke<sup>1</sup>, Christos Samakovlis<sup>1</sup>, Gianni Carraro<sup>5</sup>, Jin-San Zhang<sup>6</sup>,  
8 Denise Al Alam<sup>7</sup>, Saverio Bellusci<sup>1</sup> #

9  
10 <sup>1</sup>Cardio-Pulmonary Institute and Department of Pulmonary and Critical Care Medicine and Infectious  
11 Diseases, Universities of Giessen and Marburg Lung Center (UGMLC), member of the German  
12 Center for Lung Research (DZL), Justus-Liebig University Giessen, Giessen, Germany

13 <sup>2</sup>Department of Physiology, Justus-Liebig University Giessen, Giessen, Germany

14 <sup>3</sup>Institute of Lung Health, Justus Liebig University, Giessen, Germany

15 <sup>4</sup>Laboratoire IMoPA, UMR 7365 CNRS. Biopole de l'Universite de Lorraine. Vandoeuvre-les-Nancy  
16 54505, France

17 <sup>5</sup>Cedars-Sinai Medical Center, Lung and Regenerative Medicine Institutes, Department of Medicine,  
18 Los Angeles, CA, 90027, USA

19 <sup>6</sup>Department of Pulmonary and Critical Care Medicine. The First Affiliated Hospital of Wenzhou  
20 Medical University, Wenzhou 325035, China

21 <sup>7</sup>Lundquist institute for Biomedical Innovation at Harbor-UCLA Medical Center, Los Angeles,  
22 California, USA

23  
24 # Correspondence to: Saverio Bellusci ([saverio.bellusci@innere.med.uni-giessen.de](mailto:saverio.bellusci@innere.med.uni-giessen.de))

25

26

27

28

29 **Significance of the work:**

30 We demonstrate that Fgfr2b signaling is essential for alveolar epithelial lineage  
31 homeostasis in the adult mouse lung. Mature AT2s require Fgfr2b signaling for the  
32 maintenance of their proliferative capacity. The recently described injury activated  
33 alveolar progenitors (IAAPs) proliferate in the context of Fgfr2b deletion and  
34 functionally replace the loss of mature AT2s.

35

36 **Author's contributions:**

37 N.A designed the study, carried out the experiments, analyzed the data and wrote  
38 the manuscript. A.L. contributed to the experiments and quantification analysis. F.K  
39 contributed to performing experiments, data analysis and writing of the manuscript.  
40 A.I.V.A contributed to the experiments and quantification analysis. S.R. contributed to  
41 the experiments and provided feedback in the writing of the manuscript. J.W. and  
42 J.K. contributed to the experiments and data analysis. S.H., G.B., J.Z., C.S. and  
43 D.A.A. provided feedback, helped shape the research, discussed the results, and  
44 contributed to the final manuscript. S.B designed the project, regularly monitored the  
45 generated results, interpreted the results and wrote the manuscript in coordination  
46 with N.A. All authors reviewed the results and contributed to the final manuscript.

47

48 **Grants:**

49 S.B. was supported by grants from the Deutsche Forschungsgemeinschaft (DFG;  
50 BE4443/1-1, BE4443/4-1, BE4443/6-1, KFO309 P7, 284237345 and SFB1213-  
51 projects A02 and A04), UKGM, Universities of Giessen and Marburg Lung Center  
52 (UGMLC), DZL. J.S.Z was funded through a start-up package from Wenzhou Medical  
53 University and the National Natural Science Foundation of China (grant number

54 81472601). S.H. was supported by the UKGM (FOKOOV), the DZL and University  
55 Hospital Giessen and grants from the DFG (KFO309 P2/8, 284237345; SFB1021  
56 C05, SFB TR84 B9). DAA acknowledges support from NHLBI (R01HL141856). N.A.  
57 was funded through a start-up grant from the Cardio-Pulmonary Institute.

58

59 **Keywords:** IAAPs, AT2s, lineage tracing, Fgfr2b, proliferation and differentiation

60

61 **Running title:** Fgfr2b signaling is essential for AT2 lineage homeostasis

62

63

64

65

66 **ABSTRACT (280 words) max is 245 words**

67 Fibroblast growth factor receptor 2b (*Fgfr2b*) signaling is essential throughout lung  
68 development to form the alveolar epithelial lineage. However, its role in alveolar  
69 epithelial type 2 cells (AT2s) homeostasis was recently considered dispensable.  
70 *Sftpc*<sup>CreERT2</sup>; *tdTomato*<sup>flox/flox</sup> mice were used to delete *Fgfr2b* expression in cells  
71 belonging to the AT2 lineage, which contains mature AT2s and a novel *Sftpc*<sup>Low</sup>  
72 lineage-traced population called “injury activated alveolar progenitors” or IAAPs.  
73 Upon continuous tamoxifen exposure for either one or two weeks to delete *Fgfr2b*, a  
74 shrinking of the AT2s is observed. Mature AT2s exit the cell cycle, undergo apoptosis  
75 and fail to form alveolospheres in vitro. However, the lung morphometry appears  
76 normal, suggesting the involvement of compensatory mechanisms. In mutant lungs,  
77 IAAPs which escaped *Fgfr2b* deletion expand, display enhanced alveolosphere  
78 formation in vitro and increase drastically their AT2 signature suggesting  
79 differentiation towards mature AT2s. Interestingly, a significant increase in AT2s and  
80 decrease in IAPPs occurs after a one-week tamoxifen exposure followed by an eight-  
81 week chase period. While mature AT2s partially recover their alveolosphere  
82 formation capabilities, the IAAPs no longer display this property. Single-cell RNA seq  
83 analysis confirms that AT2s and IAAPs represent stable and distinct cell populations  
84 and recapitulate some of their characteristics observed in vivo. Our results  
85 underscore the essential role played by *Fgfr2b* signaling in the maintenance of the  
86 AT2 lineage in the adult lung and suggest that the IAAPs could represent a new  
87 population of AT2 progenitors.

88

## 89 INTRODUCTION

90

91 The fibroblast growth factor (Fgf) family is made of 22 members. Fgfs can either act  
92 in a paracrine, endocrine or intracellular fashion. The Fgfs acting through a paracrine  
93 mechanism elicit their signaling through fibroblast growth factor receptors (Fgfr) and  
94 heparin-sulfate proteoglycans. The endocrine Fgfs signal through Fgfr with the Klotho  
95 family of proteins as co-receptors, and the intracellular Fgfs display Fgfr independent  
96 signaling [1-3]. The paracrine Fgfs contain Fgf3, 7, 10, 22 and interact mainly with  
97 Fgfr2b [4]. Among the paracrine Fgfs, Fgf10 takes center stage for its non-redundant  
98 role during development, homeostasis and repair after injury [5-7]. During the  
99 pseudoglandular stage of lung development, Fgf10 is expressed dynamically in the  
100 mesenchyme in association with the newly formed epithelial buds [8]. Genetic  
101 inactivation of *Fgf10* or its receptor *Fgfr2b* leads to a lung displaying the rudimentary  
102 primary bronchi but lacking further ramifications [9-11]. Using an inducible dominant-  
103 negative Fgfr2b approach, we characterized both primary transcriptional targets and  
104 the main biological activities associated with Fgfr2b signaling. At E12.5, Fgf10  
105 signaling essentially regulates adherens junction and basement membrane  
106 organization. Fgf10 acts primarily through beta-catenin signaling and maintains the  
107 expression of Sox9, a transcription factor essential for alveolar progenitor  
108 differentiation, in the distal epithelium [12]. At E14.5, Fgfr2b signaling controls  
109 proliferation of the alveolar epithelial progenitors, and the identified primary  
110 transcriptional targets support both overlapping and distinct biological activities  
111 compared to E12.5 [13]. At E16.5, Fgfr2b signaling prevents the differentiation of AT2  
112 progenitors towards the AT1 fate (Jones and Bellusci, unpublished data). Such  
113 function is conserved during the alveolar phase of lung development in mice [14].

114 Fgf10 also plays a vital role during the repair process. For example, *Fgf10* deletion in  
115 peribronchial mesenchymal cells leads to impaired repair following injury to the  
116 bronchial epithelium using naphthalene [15, 16]. On the other hand, overexpression  
117 of *Fgf10* reduces the severity of lung fibrosis in bleomycin-induced mice [17]. Despite  
118 these diverse biological activities during development and repair after injury, Fgfr2b  
119 signaling in AT2s has been deemed dispensable during homeostasis [14, 18].  
120 Notably, the respective function of Fgfr2b signaling in our recently described, lineage-  
121 traced, AT2 subpopulations has not been defined [19].

122 Previous studies using the 3D matrigel-based alveolosphere assay in vitro and  
123 following diphtheria toxin (DTA)-based genetic deletion of lineage-labeled *Sftpc*<sup>Pos</sup>  
124 cells using *Sftpc*<sup>CreERT2/+</sup>; *Rosa26*<sup>LSL-DTA/LSL-tdTomato</sup> mice in vitro demonstrated the  
125 relevance of AT2s as stem cells for the respiratory epithelium [20, 21]. However, in  
126 both assays, the self-renewal capability is present only in a subpopulation of lineage-  
127 labeled *Sftpc*<sup>Pos</sup> AT2s as only 1-2% of the cultured FACS-isolated lineage-labeled  
128 AT2s generated alveolospheres [20]. AT2 stem cells reside in a stromal niche made  
129 of lipofibroblasts (LIFs) [5, 20, 22-24]. Some of these LIFs express Fgf10, which acts  
130 on the LIFs themselves via Fgfr1b and Fgfr2b to maintain their differentiation [5, 22].  
131 Given the role of Fgf10<sup>Pos</sup>-LIFs in maintaining AT2 stem cell proliferation [24], we  
132 propose that Fgf10 signaling to AT2s via Fgfr2b could be instrumental for the  
133 maintenance of the AT2 stem cell characteristics.

134 Using the *Sftpc*<sup>CreERT2/+</sup>; *tdtomato*<sup>flox/+</sup> mice, we previously reported the existence of  
135 two distinct AT2 subpopulations called AT2-Tom<sup>Low</sup> (aka injury-activated alveolar  
136 progenitors (IAAPs)) and AT2-Tom<sup>High</sup> (aka AT2s) [19]. IAAPs express a lower level  
137 of *Fgfr2b* and *Etv5*, indicating minor Fgfr2b signaling in these cells and a low level of  
138 AT2 differentiation markers *Sftpc*, *Sftpb*, *Sftpa1*. On the other hand, AT2s show high

139 *Sftpc*, *Sftpb*, *Sftpa1* and significant activation of *Fgfr2* signaling illustrated by the high  
140 level of *Fgfr2b* and *Etv5* expression. ATAC-seq analysis indicates these two  
141 subpopulations are distinct. Upon pneumonectomy, the number of IAAPs but not  
142 AT2s increases and IAAPs display increased expression of *Fgfr2b*, *Etv5*, *Sftpc*,  
143 *Ccnd1* and *Ccnd2* compared to sham. Therefore, our previous work suggested that  
144 IAAPs represent quiescent, immature AT2-progenitor cells in mice that could  
145 proliferate and differentiate into mature AT2s upon pneumonectomy.  
146 This study analyzed the impact of *Fgfr2b* deletion on AT2s and IAAPs during  
147 homeostasis. We have used *Sftpc*<sup>CreERT2</sup>; *tdTomato*<sup>fllox/fllox</sup> mice to lineage-trace AT2s  
148 and IAAPs and delete *Fgfr2b* expression in these subpopulations. In addition, flow  
149 cytometry, qPCR, ATAC-seq, gene arrays, scRNA-seq, immunofluorescence,  
150 alveolosphere assays and lung morphometry were carried out. Contrary to previous  
151 studies, our results indicate an essential role for *Fgfr2b* signaling in IAAPs and AT2s  
152 during homeostasis and unravel the unexpected behavior of IAAPs, likely  
153 representing a novel AT2 subpopulation with regenerative capabilities.  
154

## 155 MATERIALS AND METHODS

156

### 157 Animal experiments

158 All animals were housed under specific pathogen-free (SPF) conditions with free  
159 access to food and water. Genetically modified mice including *Sftpc*<sup>tm1(cre/ERT2,rtTA)Hap</sup>  
160 (stock number 007905), *Fgfr2*<sup>tm1Dsn</sup> (*Fgfr2-IIIb*<sup>flox</sup>) (gift from C. Dickson, [4](De  
161 Moerlooze et al., 2000)) and the Cre reporter line *tdTomato*<sup>flox</sup> (B6;129S6-  
162 Gt(ROSA)26Sor<sup>tm9(CAG-tdTomato)Hze/J</sup> (stock number 007909) were purchased from  
163 Jackson Laboratory (Bar Harbor/ME, USA). 8-16-weeks-old mice were treated with  
164 tamoxifen-containing water (1 mg/ml) (T5648, Sigma-Aldrich, Darmstadt/Germany) to  
165 induce Cre recombinase activity. All animal studies were performed according to  
166 protocols approved by the Animal Ethics Committee of the Regierungspraesidium  
167 Giessen (permit numbers: G7/2017–No.844-GP and G11/2019–No. 931-GP).

168

### 169 Lung dissociation and FACS

170 Adult mice were sacrificed, and lungs were perfused with 5 ml PBS through the right  
171 ventricle. Next, lungs were inflated via the trachea with dispase and kept in dispase  
172 (Coning, NY, USA) and Collagenase Type IV at 37°C for 40 min with frequent  
173 agitation. To obtain single-cell suspensions, the digested tissue was then passed  
174 serially through 100-, 70- and 40-µm cell strainers (BD Biosciences). First, red blood  
175 cells (RBC) were eliminated using RBC lysis buffer (Sigma-Aldrich), according to the  
176 manufacturer's protocol. Next, cells were pelleted, resuspended in FACS buffer  
177 (0.1% sodium azide, 5% fetal calf serum (FCS), 0,05% in PBS) and stained with  
178 antibodies: anti-EpCAM (APC-Cy7-conjugated, Biolegend,1:50), CD49F  
179 (APC-conjugated, Biolegend,1:50), anti-PDPN (FITC-conjugated, Biolegend, 1:20)



180 and anti-CD274 (unconjugated, Thermo Fisher, 1:100) antibodies for 20 minutes on  
181 ice in the dark, followed by washing. Then, the cells were stained for goat anti-rabbit  
182 secondary antibody Alexa fluor 488 (Invitrogen, 1:500) for 20 minutes on ice in the  
183 dark, followed by washing. Next, cells were washed and stained with SYTOX  
184 (Invitrogen), a live/dead cell stain according to the manufacturer's instructions.  
185 Finally, flow cytometry data acquisition and cell sorting were carried out using  
186 FACS Aria III cell sorter (BD Biosciences, San Jose/CA). Data were analyzed using  
187 FlowJo software version X (FlowJo, LLC).

188

### 189 **Hematoxylin and eosin staining**

190 Mouse lung tissues were fixed using 4% PFA followed by embedding in paraffin.  
191 Paraffin blocks were sectioned into 5- $\mu$ m-thick slices and placed on glass slides.  
192 Following deparaffinization, lung sections were stained with hematoxylin (Roth) for 2  
193 min, washed with running tap water for 10 min and then stained with eosin (Thermo  
194 Fisher Scientific) for 2 min.

195

### 196 **RNA extraction and quantitative real-time PCR**

197 Following lysis of FACS-isolated cells from mouse or human lungs in RLT plus, RNA  
198 was extracted using an RNeasy Plus Micro kit (Qiagen), and cDNA synthesis was  
199 carried out using QuantiTect reverse transcription kit (Qiagen) according to the  
200 manufacturer's instruction. After that, selected primers (Table 1,2) were designed via  
201 NCBI's Primer-BLAST option (<https://www.ncbi.nlm.nih.gov/tools/primer-blast/>) (for  
202 primer sequence see supplementary table). Then, quantitative real-time polymerase  
203 chain reaction (qPCR) was performed using PowerUp SYBR Green Master Mix kit  
204 according to the manufacturer's protocol (Applied Biosystems) and LightCycler 480 II

205 machine (Roche Applied Science). *Hypoxanthine guanine phosphoribosyltransferase*  
206 (*Hprt*) was used as a mouse reference gene. Data were presented as mean  
207 expression relative to *Hprt* and assembled using the GraphPad Prism software  
208 (GraphPad Software, La Jolla/CA). Statistical analyses were performed utilizing two  
209 tailed-paired Student t-test, and results were significant when  $p < 0.05$ .

210

### 211 **Immunofluorescent Staining**

212 After lung perfusion with PBS through the right ventricle, isolated lungs were fixed  
213 with 4% paraformaldehyde. Afterwards, tissues were embedded in paraffin and  
214 sectioned at 5  $\mu$ m thickness. Following deparaffinization, slides were blocked with  
215 3% bovine serum albumin (BSA) (Jackson Immunoresearch Laboratories) in PBS for  
216 1 hour at RT. Next, immunofluorescence staining was performed using overnight  
217 incubation with polyclonal anti-Prosurfactant Protein C (ProSP-C)  
218 (Merck/Millipore/Sigma-Aldrich, 1:500) followed by staining with polyclonal secondary  
219 antibody Goat anti-rabbit Alexa fluor 488 (Invitrogen,1:500). Finally, slides were  
220 mounted with ProLong Gold Antifade Reagent containing DAPI (Molecular Probes).  
221 Proliferation was assessed using the Click-iT EdU Imaging Kit (Invitrogen, Schwerte,  
222 Germany) according to the manufacturer's instructions. For the EdU experiments,  
223 EdU was injected (i.p.) two hours before mice were sacrificed (Dosage: 0.005 mg  
224 EdU/g mouse weight). Apoptosis was assessed on paraffin sections via the TdT-  
225 mediated dUTP Nick-End Labelling (TUNEL) assay using the DeadEnd Fluorometric  
226 TUNEL System (Promega, Walldorf, Germany) according to the manufacturer's  
227 instructions. Apoptosis was quantified by determining the ratio of TUNEL-positive  
228 cells to total cells in each region of interest. Multiple images ( $n > 8$ ) were acquired

229 and quantified. For each experiment, sections from at least four independent lungs  
230 were analyzed.

231

### 232 **Alveolosphere assay**

233 Sorted epithelial cells (IAAPs/Tom<sup>Low</sup> and AT2s/Tom<sup>High</sup>) from [*Sftpc*<sup>CreERT2/+</sup>;  
234 *tdTom*<sup>flox/flox</sup>] mice and resident mesenchymal cells from C57BL/6J mice (Epcam<sup>Neg</sup>,  
235 Cd31<sup>Neg</sup>, Cd45<sup>Neg</sup>, Sca1<sup>Pos</sup>) were centrifuged and resuspended separately in cell  
236 culture medium (Dulbecco's Modified Eagle Medium, Life Technologies). First,  
237 1x10<sup>4</sup> epithelial cells in 25  $\mu$ L media and 2x10<sup>4</sup> mesenchymal cells in 25  $\mu$ L media  
238 per insert (12 mm cell culture inserts with 0.4  $\mu$ m membrane Millipore) were  
239 prepared. Next, mesenchymal and epithelial cell suspensions were mixed, followed  
240 by the addition of cold Matrigel® growth factor-reduced Matrigel (Corning) at a 1:1  
241 dilution resulting in 100  $\mu$ L final volume per insert. Then, Matrigel cell suspensions  
242 were placed on the top of the filter membrane of the insert and incubated at 37°C for  
243 5 min. Next, 350  $\mu$ L of the medium was transferred to each well. Finally, cells were  
244 incubated in air-liquid interface conditions at 37°C with 5% CO<sub>2</sub> for two weeks. Media  
245 were changed 3 times per week.

246

### 247 **Microarray**

248 Purified total RNA was amplified using the Ovation PicoSL WTA System V2 kit  
249 (NuGEN Technologies). Per sample, 2  $\mu$ g amplified cDNA was Cy5-labeled using the  
250 SureTag DNA labeling kit (Agilent). Hybridization to 8x60K 60mer oligonucleotide  
251 spotted microarray slides (Human Mouse Genome, Agilent Technologies, design ID  
252 074809) and subsequent washing and drying of the slides were performed following  
253 the Agilent hybridization protocol in Agilent hybridization chambers, with following

254 modifications: 3 µg of the labeled cDNA were hybridized for 22 hours at 65°C. The  
255 cDNA was not fragmented before hybridization.

256 The dried slides were scanned at 2 µm/pixel resolution using the InnoScan is900  
257 (Innopsys). Image analysis was performed with Mapix 6.5.0 software, and calculated  
258 values for all spots were saved as GenePix results files. Stored data were evaluated  
259 using the R software and the limma package<sup>28</sup> from BioConductor. Log2 mean spot  
260 signals were taken for further analysis. Data were background corrected using the  
261 NormExp procedure on the negative control spots and quantile-normalized<sup>28,29</sup>  
262 before averaging. Log2 signals of replicate spots were averaged, and from several  
263 different probes addressing the same gene, only the probe with the highest average  
264 signal was used. Genes were ranked for differential expression using a moderated t-  
265 statistic. Finally, pathway analyses were done using gene set tests on the ranks of  
266 the t-values. Pathways were taken from the KEGG database  
267 (<http://www.genome.jp/kegg/pathway.html>).

268

## 269 **ATAC-seq**

270 25,000 FACS-sorted cells were collected and used for ATAC Library preparation  
271 using Tn5 Transposase from Nextera DNA Sample Preparation Kit (Illumina). The  
272 cell pellet was resuspended in 50 µl Lysis/Transposition reaction (12.5 µl THS-TD-  
273 Buffer, 2.5 µl Tn5, 5 µl 0.1% Digitonin, and 30 µl water) and incubated at 37°C for 30  
274 min with occasional snap mixing. Following purification of the DNA, fragments were  
275 done by Min Elute PCR Purification Kit (Qiagen). Amplification of the Library together  
276 with Indexing Primers was performed as described. Libraries were mixed in  
277 equimolar ratios and sequenced on the NextSeq500 platform using V2 chemistry.  
278 Trimmomatic version 0.38 was employed to trim reads after a quality drop below a

279 mean of Q15 in a window of 5 nucleotides. Only reads longer than 15 nucleotides  
280 were cleared for further analyses. Trimmed and filtered reads were aligned versus  
281 (vs) the mouse genome version mm10 (GRCm38) using STAR 2.6.1d with the  
282 parameters “--outFilterMismatchNoverLmax 0.1 --outFilterMatchNmin 20 --  
283 alignIntronMax 1 --alignSJDBoverhangMin 999 --outFilterMultimapNmax 1 --  
284 alignEndsProtrude 10 ConcordantPair” and retaining unique alignments to exclude  
285 reads of uncertain origin. Reads were further deduplicated using Picard 2.18.16  
286 (Picard: A set of tools (in Java) for working with next-generation sequencing data in  
287 the BAM format) to mitigate PCR artefacts leading to multiple copies of the same  
288 original fragment. Reads aligning to the mitochondrial chromosome were removed.  
289 The Macs2 peak caller version 2.1.2 was employed to accommodate the range of  
290 peak widths typically expected for ATAC-seq<sup>30</sup>. The minimum qvalue was set to -4,  
291 and FDR was changed to 0.0001. Peaks overlapping ENCODE blacklisted regions  
292 (known misassemblies, satellite repeats) were excluded.  
293 To be able to compare peaks in different samples to assess reproducibility, the  
294 resulting lists of significant peaks were overlapped and unified to represent identical  
295 regions. Sample counts for union peaks were produced using  
296 bigWigAverageOverBed (UCSC Toolkit) and normalized with DESeq2 1.18.1 to  
297 compensate for differences in sequencing depth, library composition, and ATAC-seq  
298 efficiency. Peaks were annotated with the promoter of the nearest gene in range  
299 (TSS +- 5000 nt) based on reference data of GENCODE vM15.

300

### 301 **scRNA-seq**

302 Single-cell suspensions were processed using the 10x Genomics Single Cell 3' v3  
303 RNA-seq kit. Gene expression libraries were prepared according to the

304 manufacturer's protocol. In addition, MULTI-seq barcode libraries were retrieved from  
305 the samples and libraries were prepared independently.

### 306 **Sequencing and processing of raw sequencing reads**

307 Sequencing was done on Nextseq2000, and raw reads were aligned against the  
308 mouse genome (mm10, ensemble assembly 104) and mapped and counted by  
309 StarSolo (Dobin et al., doi: 10.1093/bioinformatics/bts635) followed by secondary  
310 analysis in Annotated Data Format. Pre-processed counts were analyzed using  
311 Scanpy (Wolf et al., doi: 10.1186/s13059-017-1382-0). Basic cell quality control was  
312 conducted by considering the number of detected genes and mitochondrial content.  
313 Cells expressing less than 300 genes or having a mitochondrial content of more than  
314 20% were removed from the analysis. Further, we filtered genes if detected in less  
315 than 30 cells (<3%). Raw counts per cell were normalized to the median count over  
316 all cells and transformed into log space to stabilize the variance. We initially reduced  
317 the dimensionality of the dataset using PCA, retaining 50 principal components.  
318 Subsequent steps, like low-dimensional UMAP embedding (McInnes &  
319 Healy, <https://arxiv.org/abs/1802.03426>) and cell clustering via community detection  
320 (Traag et al., <https://arxiv.org/abs/1810.08473>), were based on the initial PCA. Final  
321 data visualization was done by the cellxgene package. The raw data have been  
322 deposited in GEO accession number GSE (pending).

323

324

325

326

327

328

329

330

331

332 **Table 1:**

| <b>Primers sequences</b> |                                   |                                   |
|--------------------------|-----------------------------------|-----------------------------------|
| <b>Gene</b>              | <b>Forward primer (5'-&gt;3')</b> | <b>Reverse primer (5'-&gt;3')</b> |
| <i>Hprt</i>              | CCTAAGATGAGCGCAAGTTGAA            | CCACAGGACTAGAACACCTGCTAA          |
| <i>Fgfr2lllb</i>         | TAAATACGGGCCTGATGGGC              | CAGCATCCATCTCCGTCACA              |
| <i>Erv5</i>              | CAGCCCGCCACGGAG                   | CCGCTATCACTTTGAAGGGC              |
| <i>Sftpc</i>             | GGTCCTGATGGAGAGTCCAC              | GATGAGAAGGCGTTTGAGG               |
| <i>Sftpb</i>             | GGCTAGACAGGCAAAGTGTG              | GACCGCGTTCTCAGAGGTG               |
| <i>Sftpa1</i>            | CAGTGTGATTGGGAGAAACCA             | ATGCCAGCAACAACAGTCAA              |

333

334

335 **Table 2:**

| <b>Genotyping Primers sequences:</b> |                                   |                                   |
|--------------------------------------|-----------------------------------|-----------------------------------|
| <b>Gene</b>                          | <b>Forward primer (5'-&gt;3')</b> | <b>Reverse primer (5'-&gt;3')</b> |
| <i>WT</i>                            | ATAGGCAGCACCGAGTCCT               | ATTCCCAGCATCCATCTCC               |
| <i>Fgfr2</i>                         | CAGTGGATCAAGCACGTGGA              | CTGGCCAAATCTCCAAGGGA              |

336

337 **RESULTS**

338

339 **IAAP and AT2 subpopulations respond differently to *Fgfr2b* deletion**

340 We recently isolated two AT2 lineage-labeled *Sftpc*<sup>Pos</sup> cells (called IAAPs and mature  
341 AT2) in the mouse adult lung based on differential levels of Tomato expression [19].  
342 A common assumption in the field is that the *Rosa26* locus is ubiquitous (expressed  
343 in all the cells) and homogeneous (expressed at the same level in all the cells of the  
344 body). Against these assumptions, the initial analysis of the *Rosa26*-LacZ mice  
345 already established that LacZ expression was not uniform throughout the embryo  
346 [25]. In addition, LacZ expression was also described to be heterogeneous in the  
347 adult mouse (Jackson lab (129-*Gt(ROSA)26Sor/J* Stock No: 002292). Interestingly,  
348 IAAPs and AT2s are observed regardless of whether *tdTomato*<sup>flox/flox</sup> or *tdTomato*<sup>flox/+</sup>  
349 reporter mice were used [19]. These results support the conclusion that it is primarily  
350 the level of tomato expression from the *Rosa26* promoter and not the efficiency of  
351 recombination of the *LoxP-STOP-LoxP-tomato* cassette downstream of the *Rosa26*  
352 promoter, which is different in these two subpopulations.

353 To unravel the function of *Fgfr2b* signaling in the AT2 lineage, [*Sftpc*<sup>CreERT2/+</sup>;  
354 *Fgfr2b*<sup>flox/flox</sup>; *tdTom*<sup>flox/flox</sup>] (*Fgfr2b*-cKO) mice, called experimental (Exp.) group, were  
355 initially treated with tamoxifen water for 7 days (Figure 1a, b). [*Sftpc*<sup>CreERT2/+</sup>;  
356 *Fgfr2b*<sup>+/+</sup>; *tdTom*<sup>flox/flox</sup>] mice undergoing the same treatment were used as controls  
357 (Ctrl).

358

359

360

361



362 Flow cytometry analysis on harvested lungs underpinned the presence of IAAP (AT2-  
363 Tom<sup>Low</sup>) and AT2 (AT2-Tom<sup>High</sup>) populations. We named the IAAP or AT2 cells from  
364 the Ctrl animals, C-IAAPs and C-AT2s and the IAAP or AT2 cells from the Exp.  
365 animals, E-IAAPs and E-AT2s. In Ctrl lungs, we observed an average of 9.93% +/-  
366 1.13% (n=4) C-IAAPs and 44.75 % +/- 1.22% (n=4) of C-AT2s (of total Epcam<sup>Pos</sup>) as  
367 previously described (Figure 1a) [19]. In Exp. lungs, we found that E-IAAPs  
368 represented 27.05% (27.05% ± 1.83%, n=4) of the overall Epcam<sup>Pos</sup> cells, and the E-  
369 AT2s represented 25.70 % (25.70% ± 2.45%, n=4) of the overall Epcam<sup>Pos</sup> cells  
370 (Figure 1b). The decrease in the number of AT2 cells in Exp. vs Ctrl lungs (25.70%  
371 vs 44.75 %, respectively) indicates that the *Fgfr2b* pathway is critical for maintaining  
372 AT2s.

373

374 Interestingly, a concomitant increase in the percentage of IAAPs in Exp. vs Ctrl was  
375 observed (27.05% vs 9.93%), suggesting that IAAPs, previously quiescent, are  
376 becoming active and proliferative.

377 Next, we examined whether *Fgfr2b* is haplo-sufficient in alveolar epithelial lineage by  
378 investigating the consequences of losing a single copy of *Fgf2b* on the percentage of  
379 AT2s and IAAPs. Using *Fgfr2b* hets mice and Ctrl *Fgf2b*<sup>+/+</sup> (WT) mice, we carried out  
380 the previously described FACS-based approach to isolate AT2s and IAAPs [19]. No  
381 difference in the percentage of IAAPs and AT2s in WT (*Fgfr2b*<sup>+/+</sup>) vs *Fgfr2b*<sup>+/-</sup> hets  
382 could be detected, indicating that *Fgfr2b* is haplosufficient in *Sftpc*-expressing cells.  
383 (Figure S1).

384 To investigate the efficiency of recombination in the IAAPs and AT2s in Exp.  
385 (*Sftpc*<sup>CreERT2/+</sup>; *dTomato*<sup>flox/flox</sup>; *Fgfr2b*<sup>flox/flox</sup>) (n=3) vs Ctrl lungs (*Sftpc*<sup>CreERT2/+</sup>;  
386 *dTomato*<sup>flox/flox</sup>; *Fgfr2b*<sup>+/+</sup>) (n=2) (Figure S2), we analyzed the lungs 36 hours after a

387 single dose of Tam IP. FACS analysis was carried out to quantify the abundance of  
388 IAAPs and AT2s (out of Epcam) in Ctrl and Exp. lungs. We chose the early 36-hour  
389 time point to analyze the recombination events before the possible onset of a  
390 phenotype linked to *Fgfr2b* deletion, impacting the IAAPs/AT2s ratio. As a quality  
391 control, we found a similar percentage of Epcam positive cells over total cells in Exp.  
392 vs Ctrl (23.4% vs 21.1%, respectively). Next, we analyzed the percentage of AT2s,  
393 which at later time points (at day 7 and 14 on continuous Tam water) is significantly  
394 decreased in Exp. vs Ctrl lungs (Figure 1b). As we used *tdTomato*<sup>flox/flox</sup> mice, we  
395 observed two peaks for the AT2s corresponding to one vs two copies of recombined  
396 *LoxP-STOP-LoxP-tomato* cassette. We found a slightly higher percentage of AT2s  
397 over Epcam in Exp. vs Ctrl lungs (37.7 vs 29.4%), indicating that the efficiency of  
398 labeling in AT2s in Exp. lung was not impaired compared to Ctrl lungs. The  
399 percentage of IAAPs over Epcam<sup>Pos</sup> cells in Exp. vs Ctrl lungs (6.3% vs 7.6%,  
400 respectively) indicate similar labeling of these cells in Ctrl and Exp. conditions.  
401 Altogether, these data indicate that the efficiency of labeling of IAAPs and AT2s in  
402 Ctrl and Exp. lungs is comparable at this earlier time point, suggesting that the  
403 increase in the IAAPs to AT2 ratio in Exp. lung at later time points is not due to a  
404 difference in the recombination efficiency of the *Rosa26* locus at earlier time points.  
405 We also compared the global efficiency of recombination at later time points in Exp.  
406 vs Ctrl by IF (without distinguishing between IAAPs and AT2s as this is not possible  
407 by IF using only Tomato) by quantifying the percentile of Tom<sup>Pos</sup>Sftpc<sup>Pos</sup>/Sftpc<sup>Pos</sup> at  
408 days 7 and 14. Our results indicate at day 7 similar proportion of  
409 Tom<sup>Pos</sup>Sftpc<sup>Pos</sup>/Sftpc<sup>Pos</sup> (d7: 77% ± 5.4 in Ctrl vs 70% ± 0.48 in Exp., n=4). Such  
410 observation was also made at day (d14: 84% ± 4.23 in Ctrl vs 82% ± 3.97 in Exp.,  
411 n=4) (Figure 4b).

412 To investigate whether *Fgfr2b* was successfully deleted in both IAAPs and AT2s, RT-  
413 PCR was carried out to detect the wild type and mutant *Fgfr2b* transcripts (Figure 1c)  
414 [4]. The mutant *Fgfr2b* transcript (195 bp) was present in E-IAAPs and E-AT2s in  
415 *Fgfr2b*-cKO lungs, and as expected, was not detected in the corresponding cells (C-  
416 IAAPs and C-AT2s) from Ctrl lungs (Figure 1c). Sequencing of wild type and mutant  
417 cDNA bands that were cut and purified from agarose gel confirmed the deletion of  
418 exon 8 encoding the *Fgfr2b* isoform (Figure S3).

419 Next, qPCR was performed on FACS-isolated IAAPs and AT2s isolated from Ctrl and  
420 Exp. lungs. As previously described, we found that C-AT2s compared to C-IAAPs are  
421 enriched in *Fgfr2b*, *Etv5*, and the differentiation markers *Sftpc*, *Sftpb* and *Sftpa1*  
422 (Figure 1d) [19]. However, in contrast to the Ctrl, *Fgfr2b* expression between E-IAAPs  
423 and E-AT2s is reduced. Moreover, *Etv5* expression is significantly downregulated in  
424 E-AT2s vs E-IAAPs and the expression levels of *Sftpc*, *Sftpb*, and *Sftpa1* are not  
425 substantially different between E-IAAPs and E-AT2s (Figure 1e).

426

#### 427 **ATAC-seq analysis and transcriptomic analyses reveal that *Fgfr2b* deletion** 428 **leads to activation of IAAP cells**

429 To carry out genome-wide profiling of the epigenomic landscape, an assay for  
430 transposase-accessible chromatin using sequencing (ATAC-seq) was performed on  
431 C-IAAP and E-IAAP subpopulations at day 7 on tamoxifen water (Figure S4).  
432 Interestingly, our data indicated a high signal background in E-IAAPs (data not  
433 shown), often seen in dying cells [26].

434 After correcting this elevated background to remove the contribution of dying cells,  
435 common and distinct peaks were identified for C-IAAPs and E-IAAPs (Figure S4a).  
436 Gene set enrichments based on regions of opened chromatin were carried out. Gene

437 set enrichment (corrected P-value smaller than 0.2, top 50 sets) between C-IAAPs  
438 and E-IAAPs using Kobas PANTHER predicted that genes belonging to the  
439 inflammation mediated by chemokines and cytokine signaling pathway as well as  
440 genes controlling apoptosis signaling pathways were significantly upregulated in E-  
441 IAAPs compared to C-IAAPs (data not shown). Further analysis of the ATAC-seq  
442 data using the Reactome database indicated that the chromatin in loci of genes  
443 belonging to metabolism, metabolism of lipids and lipoprotein and immune genes  
444 was more open in E-IAAPs (Figure S4b).

445 We also explored using gene array carried out between C-AT2s, C-IAAPs and E-  
446 IAAPs captured at day 7 of tam water exposure, the status of the genes belonging to  
447 cell cycle, Fgfr2b transcriptomic signature previously identified [12] [13, 27] and the  
448 AT1/AT2 signature [28] (Figure 2). Our data confirm that C-IAAPs are quiescent cells  
449 compared to C-AT2s. However, we observe a drastic upregulation of cell cycle genes  
450 in E-IAAPs consistent with their activated status (Figure 2a). We also found that  
451 Fgfr2b signature at E12.5 [12] (Figure 2b), E14,5 [13] (Figure 2c) and E16.5 [27]  
452 (Figure 2d) is enriched in C-AT2s vs C-IAAPs. We also found these signatures to be  
453 upregulated in E-IAAPs, supporting the activation of Fgfr2b signaling in these cells  
454 (Figure 2b-d). Finally, we examined the status of the AT2 and AT1 signatures. As  
455 previously described, the C-AT2s are mature AT2s and express a high level of the  
456 AT2 signature compared to the undifferentiated C-IAAPs. By contrast, E-IAAPs  
457 display a significant enrichment in the AT2 signature, suggesting that these cells  
458 differentiate towards mature AT2s (Figure 2e).

459 Interestingly, we found that the AT1 signature is also drastically increased in E-IAAPs  
460 vs C-IAAPs (Figure 2f). Comparison of the AT1 signature in C-IAAP vs C-AT2  
461 reveals that only part of this signature is increased in C-IAAPs, but this increase

462 includes bona fide AT1 markers such as *Hopx* and *Pdpr*. The emerging picture is  
463 therefore that E-IAAPs appear to display both an AT1 and an AT2 signature,  
464 suggesting that the lineage-labeled *Sftpc*<sup>Pos</sup> IAAP cells have the potential to engage  
465 into the AT1 lineage, a property that is well-accepted for mature AT2s.

466 Altogether, we conclude that the E-IAAPs analyzed on day 7 during tamoxifen water  
467 exposure are made of apoptotic and surviving cells. However, after background  
468 correction, a sub-population of E-IAAPs, highly active metabolically, likely  
469 proliferative, displaying increased Fgf signaling activation, enhanced AT2 and AT1  
470 signatures and geared towards lipoprotein metabolism, which is associated with  
471 surfactant production, emerged.

472

#### 473 **Fgfr2b inactivation in the AT2 lineage leads to the loss of Fgfr2b signaling in** 474 **AT2s and activation of Fgfr2b signaling in IAAPs**

475 The AT2s and IAAPs were compared between Exp. and Ctrl lungs using qPCR and  
476 immunofluorescence staining on cytopins of sorted cells (Figure 3a). qPCR analysis  
477 of AT2 demonstrated a significant decrease of *Fgfr2b* and *Etv5* expressions in Exp.  
478 vs Ctrl lungs, corroborating the loss of Fgfr2b signaling in these cells; however, no  
479 changes in the expression of *Sftpc*, *Sftpb*, and *Sftpa1* was observed in these cells  
480 (Figure 3b). By contrast, in IAAPs, significant upregulation of *Fgfr2b*, *Etv5*, *Sftpc* and  
481 *Sftpb* was identified (Figure 3c). These changes in *Fgfr2b* and *Sftpc* mRNA levels  
482 were validated at the protein level by cytospin of isolated AT2s and IAAPs from Exp.  
483 and Ctrl lungs, followed by immunofluorescence staining (Figure 3d,e). These results  
484 support the loss of Fgfr2b signaling in AT2s and activation of Fgfr2b signaling in  
485 IAAPs in Exp. vs Ctrl lungs.

486

487 **Genomic analysis in *Fgfr2b*-cKO reveals that the *Fgfr2b* locus is differentially**  
488 **impacted in mature AT2s and IAAPs**

489 Given the surprising result that *Fgfr2b* signaling was activated in E-IAAPs despite the  
490 *Fgfr2b* deletion observed initially in these cells on day 7 after tamoxifen treatment  
491 (Figure 1e), the mice were treated for a longer time with tamoxifen to ensure that  
492 *Fgfr2b* deletion was complete. Next, the presence of the mutant and wild-type *Fgfr2b*  
493 transcripts was analyzed by RT-PCR on day 14 after tamoxifen treatment  
494 (continuous tamoxifen water treatment). Surprisingly, the results indicate that in E-  
495 IAAPs from *Fgfr2b*-cKO lungs, the mutated *Fgfr2b* transcript was barely detectable,  
496 while the mutated transcript was still detected in *Fgfr2b*-cKO E-AT2s at both time  
497 points (Figure 4a,b).

498 To quantify the mutated and wild type *Fgfr2b* on day 7 and day 14, qPCR for the  
499 detection of exon 8 (the deleted exon) vs exon 7 (reflecting the intact *Fgfr2b* locus)  
500 was performed on the genomic DNA of AT2s and IAAPs from *Fgfr2b*-cKO and Ctrl  
501 lungs. The results show that on day 7, the relative presence of the mutated and wild  
502 type *Fgfr2b* in E-IAAPs was 39% and 61%, respectively. However, on day 14, wild  
503 type *Fgfr2b* increased to 100% while the mutated *Fgfr2b* was no longer detected,  
504 indicating that at this time point E-IAAPs contain mostly the wild type *Fgfr2b* (Figure  
505 4c). In E-AT2s, by contrast, there was an increase in the percentage of mutated  
506 *Fgfr2b* from day 7 to day 14 (from 61% to 79%), indicating that continuous deletion of  
507 the *Fgfr2b* allele in AT2 cells occurs. This result supports the amplification of E-  
508 IAAPs containing wild type *Fgfr2b* and the continuous deletion of *Fgfr2b* in E-AT2s.  
509 However, the molecular mechanisms involved in the expansion of the E-IAAPs with  
510 the wild type *Fgfr2b* allele are still unclear. One possibility is that the previously  
511 described low level of *Sftpc* (which should translate into a lower level of Cre

512 recombinase) associated with the closed chromatin configuration in IAAPs renders  
513 difficult the efficient recombination of the exon 8 of the *Fgfr2b* locus.

514

515 **Reduction of tdTomato<sup>Pos</sup> cells along with enhanced apoptosis and**  
516 **proliferation in Exp. *Fgfr2b*-cKO**

517 FACS analysis of the percentage of tdTomato<sup>Pos</sup> over Epcam<sup>Pos</sup> in Ctrl and *Fgfr2b*-  
518 cKO indicates the reduction of tdTomato labeled cells following *Fgfr2b* deletion on  
519 day 7 and day 14 (Figure 5a,b). Quantification of tdTom<sup>Pos</sup> cells over total (DAPI<sup>Pos</sup>)  
520 cells on sections supports this result (Figure 5c).

521 In addition, Sftpc IF staining of Ctrl and Exp. lungs was performed and quantified  
522 (Fig. 5c). The results indicate a trend towards a decrease of Sftpc<sup>Pos</sup> tdTom<sup>Pos</sup> over  
523 total cells in *Fgfr2b*-cKO compared to Ctrl on days 7 and 14.

524 We also investigated proliferation and cell death of tdTom<sup>Pos</sup> cells by  
525 immunofluorescence staining on lung sections on days 7 and 14 (Figure 5d,e). In this  
526 context and as previously reported [19], Tomato fluorescence on sections does not  
527 distinguish between IAAPs and AT2s. On days 7 and 14, a significant increase in  
528 proliferation (Figure 5d) and apoptosis (Figure 5e) in tdTom<sup>Pos</sup> cells was observed,  
529 suggesting that lineage-labeled subpopulations undergo apoptosis and proliferation  
530 simultaneously in Exp. lungs. These results, combined with the expansion of the  
531 IAAPs and the loss of AT2s in Exp. lungs, indicate that upon *Fgfr2b* deletion the  
532 IAAPs proliferate while the AT2s die.

533

534 **The lung structure remains Intact following *Fgfr2b* deletion in the AT2 lineage**

535 To investigate whether there is a change in the lung structure after *Fgfr2b* deletion,  
536 lung morphometry analysis was performed on days 7 and 14 after tamoxifen

537 treatment. Our results demonstrate no changes in alveolar space, septal wall  
538 thickness and MLI in *Fgfr2b*-cKO compared to Ctrl (Figure 6a-e).

539 These results suggest that the lack of abnormal lung phenotype is linked to a  
540 continuous compensatory mechanism that replenishes the mature AT2 pool.  
541 Therefore, we hypothesized that IAAPs, as immature AT2 cells, are the cells that  
542 proliferate and differentiate to mature AT2 cells.

543

544 **Deletion of *Fgfr2b* in the AT2 lineage leads to loss of self-renewal capability in**  
545 **mature AT2s and a gain of alveolosphere formation potential in IAAPs**

546 To compare the proliferative capacity of IAAPs and AT2s in Ctrl and *Fgfr2b*-cKO  
547 lungs, FACS-based sorted cells were co-cultured with  
548 Cd31<sup>Neg</sup>Cd45<sup>Neg</sup>Epcam<sup>Neg</sup>Sca1<sup>Pos</sup> resident lung mesenchymal cells according to a  
549 previously published protocol (Figure 7a). AT2s from Ctrl lungs behaved as *bona fide*  
550 AT2 cells as they formed alveolospheres with the expected colony-forming efficiency  
551 (Figure 7b,c). By contrast, AT2s from *Fgfr2b*-cKO lungs demonstrated a significant  
552 decrease in alveolosphere forming capabilities compared to the corresponding Ctrl,  
553 suggesting the loss of proliferative capabilities upon *Fgfr2b* deletion ( $0.22\% \pm 0.13$  vs  
554  $1.20\% \pm 0.36$ , n=3) (Figure 7c). As previously described, IAAPs from Ctrl lungs  
555 displayed weak organoid forming capabilities, which is in line with their quiescent  
556 status [19]. Interestingly, IAAPs from *Fgfr2b*-cKO lungs showed a significant increase  
557 in alveolosphere formation, which is consistent with their transition towards the AT2  
558 status ( $0.02\% \pm 0.01$  vs  $0.15\% \pm 0.05$ , n=3) (Figure 7d,e). Supporting this conclusion,  
559 we observed differential viability of FACS-isolated AT2s and IAAPs from Ctrl and  
560 *Fgfr2b*-cKO lungs. AT2s displayed decreased viability in Exp. vs Ctrl lungs ( $18,27\% \pm$   
561  $1,64\%$  vs  $72,33\% \pm 5,62\%$ , n=3). By contrast, a sharp increase in viability was



562 observed for IAAPs in Exp. vs Ctrl lungs ( $72\% \pm 4\%$  vs  $10,17\% \pm 0,98\%$ ,  $n=3$ )  
563 (Figure S5). These results suggest that IAAPs in *Fgfr2b*-cKO lungs display progenitor  
564 behavior characteristics similar to mature AT2s in the Ctrl lungs. Indeed, such  
565 progenitor-like behavior was previously suggested in vitro. Using precision-cut lung  
566 slides from [*Sftpc*<sup>CreERT2/+</sup>; *Fgfr2b*<sup>+/+</sup>; *tdTom*<sup>lox/lox</sup>] mice cultured in vitro, we  
567 demonstrated that mature AT2s are lost while IAAPs are expanded. In vivo, we also  
568 showed that the IAAPs are expanding following pneumonectomy [19].

569

570 **E-AT2s regain their alveolosphere formation capabilities following a long**  
571 **chasing period after Tamoxifen exposure**

572 We also tested the capacity of the E-AT2 and the E-IAAPs to give rise to  
573 alveolospheres in Exp. mice exposed to Tam water for one week followed by a chase  
574 period of 8 weeks. In these conditions, a partial but significant rescue of the capacity  
575 of the E-AT2 was observed compared to the E-AT2 arising from animals exposed to  
576 Tam water for one week. On the other hand, the E-IAAPs lost their proliferative  
577 activity after such a long chase period compared to the E-IAAPs isolated from one-  
578 week tamoxifen treatment. The ratio of IAAPs or AT2s over the total Tom<sup>Pos</sup> cells  
579 after one-week tamoxifen water, followed by a two-week or eight-week chase period,  
580 is represented in Figure 7e. Our results indicate that for the one-week and one-week  
581 plus two-week chase period, the percentile of E-AT2 and E-IAAPs is roughly  
582 equivalent and around 50%, down from 80% for the C-AT2s, up from 18% for the C-  
583 IAAPs. However, for the one-week tamoxifen plus eight-week chase period, these  
584 percentiles have almost returned to normal. The complete return to normality after an  
585 eight-week chase is likely hampered by the previously reported leakiness of the  
586 *Sftpc*<sup>CreERT2</sup> driver, which in experimental mice continuously deletes *Fgfr2b* in AT2s

587 arising either from de novo targeted AT2s or from the IAAPs which have  
588 differentiated into AT2s (see also Figure 9). Interestingly, such a dynamic mechanism  
589 was also observed in the context of bleomycin injury in mice, where at day 14  
590 following bleomycin administration (at the peak of fibrosis), the AT2s decrease while  
591 the IAAPs simultaneously increase. On day 28, when the fibrosis resolution process  
592 has taken place, the percentile of IAAPs and AT2s have almost normalized (Zhang  
593 and Bellusci, data not shown\_Please see Supplementary Figure for reviewers only).

594

### 595 **Transition of IAAPs towards AT2s in response to *Fgfr2b* deletion**

596 The average expression of tdTomato intensity in the IAAP cells, obtained by flow  
597 cytometry in Ctrl and *Fgfr2b*-cKO lungs was quantified (Figure 8a). Our results  
598 indicate an expansion of the IAAPs in *Fgfr2b*-cKO vs Ctrl lungs towards higher  
599 tdTomato intensity. Furthermore, quantifying the mean fluorescence intensity in  
600 IAAPs in *Fgfr2b*-cKO vs Ctrl lungs confirmed this increase (Figure 8b).

601 Next, the level of expression of *Tomato* mRNA in FACS-isolated IAAPs in *Fgfr2b*-  
602 cKO vs C-IAAPs and C-AT2s in Ctrl lungs was quantified and compared by qPCR.  
603 We found a substantial upregulation of *Tomato* expression upon *Fgfr2b* deletion  
604 (Figure 8c), suggesting that in the *Fgfr2b*-cKO lungs, the IAAPs are transitioning  
605 towards an AT2 status. Interestingly, ATAC-seq analysis indicated more open  
606 chromatin, in E-IAAPs vs C-IAAPs, in the *Rosa26* locus, containing the *tdTomato*  
607 gene (data not shown).

608 These results are also in line with the qPCR analysis of the AT2 cell differentiation  
609 *Sftpc* indicating increased expression in E-IAAPs vs C-IAAPs and a level of  
610 expression close to the one observed in C-AT2s (Figure 8c)

611

612 **ScRNA-seq analysis of the AT2 lineage demonstrates that IAAPs and mature**  
613 **AT2s exist as two independent but related clusters**

614 Next, we used scRNA-seq to expand the profiling of IAAPs and AT2s beyond the  
615 bulk population analysis done previously. In particular, scRNA-seq allows defining  
616 better the level of heterogeneity present in given populations (Fig. 8d-l). As we  
617 previously described that IAAPs get activated and proliferate upon pneumonectomy,  
618 we isolated the IAAPs and AT2s on day 7 after sham or PNX. The results presented  
619 below focus only on the sham, which we considered a surrogate for Ctrl lungs.

620 First, we used flow cytometry to sort separately IAAPs and AT2s cells from sham  
621 lungs (obtained from pooling these cells from 3 mice). As the C-IAAPs were  
622 described as more fragile than the C-AT2s following flow cytometry, we loaded on  
623 the 10X chromium chip a total of 9000 cells made of 3000 C-AT2s and 6000 C-  
624 IAAPs. Fine clustering allowed us to distinguish 6 clusters (AT2-1 to AT2-6) (Figure  
625 8d). Then, the lineage-labeled cluster(s) which corresponded to the IAAPs was  
626 identified by interrogating the transcriptomic signature (arising from bulk RNAseq)  
627 obtained by comparing C-IAAPs and C-AT2s [19]. Our results indicated that the AT2-  
628 1 cluster displayed a high level of IAAPs signature compared to the other clusters  
629 (Figure 8e).

630 We also monitored the presence of a transcriptomic signature enriched in E-IAAPs vs  
631 C-IAAPs (Figure 8f). This signature is also normally massively decreased in C-  
632 IAAPs vs C-AT2s. However, the cells in the AT2-1/IAAPs cluster in our scRNA-seq  
633 displayed a higher level of this signature than the AT2s suggesting that the IAAPs  
634 arising from sham lungs display similar transcriptomic profiles as the E-IAAPs and  
635 are therefore activated (Figure 8f).

636 Next, we examined the *Fgfr2b* transcriptomic signature at E14.5 and found it to be  
637 present in the AT2-1/IAAPs cluster, albeit at a lower level compared to the AT2s  
638 cluster (Figure 8g). Consistent with previous results, we also found that *Sftpb*  
639 expression was decreased in IAAPs vs AT2s (Figure 8h). A similar observation was  
640 done with the AT2 transcriptomic signature (Figure 8i). Confirming the bulk  
641 population analysis (Figure 2f), we found that the AT1 signature was also significantly  
642 increased in IAAPs vs AT2s. (Figure 8j). We also found that the IAAPs contained  
643 cells expressing *Pcna* and a higher level of mitochondrial content (Figure 8k,l),  
644 thereby supporting the previous observation that IAAPs were proliferative and  
645 metabolically active.

646 Interestingly, we did not find a large number of *Pd-11* (*Cd274*) expressing cells in our  
647 data set, suggesting that either these cells did not survive in our experimental  
648 conditions (even though roughly 50% of the IAAPs should be expressing Pd-11 both  
649 at the protein and mRNA level). The alternative possibility is that these cells lost *Pd-*  
650 *11* mRNA expression during scRNA-seq. In our experimental conditions, the time  
651 separating the isolation of the lungs from the loading of the cells on the 10X Genomic  
652 chip, which is known to influence gene expression, was around 5 hours.

653 In summary, we have demonstrated that the IAAPs and AT2s represent two  
654 transcriptionally stable and distinct populations of *Sftpc*<sup>Pos</sup> cells. Fine clustering  
655 indicated heterogeneity in AT2s (with five subclusters). However, such heterogeneity  
656 was not detected in the IAAPs. It is still unclear if such a result is because initial  
657 IAAPs subpopulations are excluded from the analysis process due to their fragility or  
658 if the IAAPs change their transcriptomic profile over time during the scRNA-seq  
659 process. More work is needed to clarify this critical aspect.

660 **DISCUSSION**

661

662 The model for our study is presented in Figure 9. Using the *Sftpc*<sup>CreERT2/+</sup>;  
663 *tdTomato*<sup>flox/+</sup> mice, we have previously described the existence of two distinct  
664 subpopulations of lineage-traced *Sftpc*<sup>Pos</sup> cells based on the level of Tomato  
665 expression. The AT2-Tom<sup>High</sup> represent the mature AT2 cells. On the other hand, the  
666 AT2-Tom<sup>Low</sup> displayed characteristics of immature AT2 cells that could proliferate  
667 and differentiate towards mature AT2 cells in the context of pneumonectomy. These  
668 cells were proposed to represent a novel progenitor population for mature AT2 cells  
669 [19]. Due to these characteristics, we are calling them “injury-activated alveolar  
670 progenitors” or IAAPs. In the context of *Fgfr2b* deletion, both the AT2s and IAAPs  
671 undergo apoptosis. Our ATAC-seq data supports these results showing a much  
672 higher background noise in E-IAAPs on day 7 compared to the corresponding Ctrl.  
673 Such high background noise has been associated with apoptosis [26]. In addition, IF  
674 data showed an increase in the *tdTom*<sup>Pos</sup> TUNEL<sup>Pos</sup> cells. Unfortunately, IF for  
675 Tomato does not distinguish between AT2s and IAAPs on sections [19]. As E-AT2  
676 cells have lost their proliferative capabilities in the context of the alveolosphere  
677 assay, AT2s are likely the most affected cells by the loss of *Fgfr2b*. This conclusion is  
678 supported by the high expression level of the mutated transcript in E-AT2s on day 7  
679 of tamoxifen treatment. In addition, while in the AT2 pool, this apoptotic phenotype is  
680 fully penetrant. In the IAAP pool, we observed the emergence of lineage-labelled  
681 IAAP cells that did not display *Fgfr2b* deletion. This result suggests that in these  
682 IAAP cells, Cre would act preferentially in the *Rosa26* locus to activate Tomato  
683 expression but would not operate efficiently on the *Fgfr2b* locus to delete the exon 8.

684 These cells would therefore represent transient amplifying cells with progenitor-like  
685 properties.

686 Interestingly, a disconnect between Tomato expression (serving as quality control for  
687 Cre activity) and Cre-induced Diphtheria Toxin (DTA) activity in AT2 cells has been  
688 previously reported [20]. The authors used *Sftpc*<sup>CreERT/+</sup>, *R26*<sup>LoxP-STOP-LoxP-Tomato</sup>,  
689 *R26*<sup>LoxP-GFP-STOP-LoxP-DTA</sup> to label the AT2 cells and induce in the same time the lethal  
690 expression of DTA in these cells after a single dose of tamoxifen. It was observed  
691 that lineage-labeled AT2 cells (which generally should have died due to DTA  
692 expression) proliferated clonally following AT2 killing. These data served as a base to  
693 demonstrate that AT2 are stem cells. To explain their results, the authors proposed  
694 that “by chance, Tamoxifen-induced recombination occurred only at the *Rosa*<sup>LoxP-</sup>  
695 *STOP-LoxP-Tomato* locus in a proportion of AEC2s (AT2s), thereby lineage labeling, but not  
696 killing these AEC2s (AT2s)” [20]. A puzzling possibility in this experiment is that the  
697 lineage-labeled AT2 cells which proliferated clonally following AT2 killing arise from  
698 the lineage-labelled IAAPs.

699 The interpretation of these results is consistent with our published observation that in  
700 the context of precision-cut lung slices from *Sftpc*<sup>CreERT2/+</sup>; *tdTomato*<sup>flox/flox</sup> lungs  
701 cultured in vitro, AT2s are massively killed, leaving intact the IAAPs, which then  
702 expand to become mature AT2s [19]. In the context of *Fgfr2b* deletion, rather than  
703 random recombination of one allele vs the other upon tamoxifen administration, an  
704 alternative scenario is that a subset of lineage-labelled IAAPs are or become  
705 resistant to *Fgfr2b* deletion, allowing them to survive. We call these cells Resistant  
706 IAAP cells to *Fgfr2b* deletion (or RIAAP cells). The mechanisms involved in the  
707 resistance in RIAAP cells will require further investigation. Novel mechanisms are  
708 likely at play as this observation is not compatible with a simple difference in

709 chromatin opening, restricting, for example, the accessibility of the *Fgfr2b* locus. A  
710 closed chromatin configuration for the *Fgfr2* locus would expect to hamper both the  
711 recombination of the *exon 8* and the expression of *Fgfr2b* itself. As *Fgfr2b* expression  
712 is, on the contrary, increased in RIAAPs, it is clear that this primary epigenetic  
713 mechanism is not sufficient to explain our results. These results also suggest that the  
714 IAAP pool is itself heterogeneous, and the difference between surviving RIAAPs and  
715 dying IAAPs will need further clarification. We also propose that the RIAAPs  
716 proliferate and get progressively committed towards mature AT2s. Based on the  
717 increased expression of *Fgfr2b* and *Etv5* and the AT2 differentiation markers, we  
718 propose that Fgf signaling in these cells is likely driving the proliferation and  
719 differentiation process.

720 Further experiments will have to be carried out to identify the Fgf ligand, likely Fgf7 or  
721 Fgf10, driving these processes. These differentiated AT2s arising from RIAAPs  
722 (called DRIAAPs) are then, due to the previously described leakiness of the  
723 *Sftpc*<sup>CreERT2</sup> driver [19], undergoing *Fgfr2b* deletion creating a constant cycle of  
724 proliferative and apoptotic alveolar epithelial cells allowing to maintain AT2  
725 homeostasis. It is also essential to consider that non-lineage labeled AT2s are still  
726 present in the Exp. lung. In our conditions, our labeling efficiency of AT2 cells is  
727 around 77% [19]. Therefore, it is possible that in the E-AT2 pool, there is a mixture of  
728 cells arising from E-IAAPs and cells de novo arising from non-lineage labeled AT2s,  
729 which undergo Cre-based recombination in a tamoxifen independent manner.  
730 Indeed, the leakiness of the Cre in the *Sftpc*<sup>CreERT2</sup> line used for our study is relatively  
731 high and gives rise to around 5% of Tom<sup>Pos</sup> cells/total cells labeled in mice exposed  
732 to water compared to 25% in the context of tamoxifen water [19].

733 The long-term consequences of this new equilibrium are still unclear. In addition, how  
734 different are the DRIAAPs from bona fide AT2s is still unknown. The overall effect of  
735 such a process triggered by *Fgfr2b* deletion in AT2s and IAAPs is a zero-sum game  
736 in terms of the appearance of a deleterious, emphysematous-like phenotype.

737

738 It was previously reported that mutant mice displaying specific deletion of *Fgfr2* in  
739 AT2 cells were less prone to repair after injury, displayed enhanced mortality, and  
740 had reduced AT2 cells overall [29]. During homeostasis, *Fgfr2* deletion resulted in  
741 increased airspace and collagen deposition, as well as a reduced number of AT2  
742 cells supporting our result that *Fgfr2* is essential for AT2 maintenance. Earlier work  
743 investigating the consequences of the loss of *Etv5* in AT2 cells during homeostasis  
744 and repair after bleomycin-induced lung injury showed that *Etv5* is required to  
745 maintain AT2 cells [30]. Upon *Etv5* deletion, AT2s transdifferentiated to AT1s.  
746 Furthermore, the repair process of the epithelium after lung injury was impaired,  
747 resulting in fewer AT2 cells altogether. As *Etv5* is regulated by *Fgfr2b* signalling [31],  
748 it was suggested that *Etv5* in AT2 cells is controlled by Ras-mediated ERK signalling  
749 [30].

750 A recent paper reported also the inactivation of *Fgfr2* in AT2s using the *Sftpc*<sup>CreERT2</sup>  
751 driver line [14]. Their study concluded that *Fgfr2* signaling is dispensable during  
752 homeostasis in the adult while it prevents the differentiation of AT2s towards the AT1  
753 lineage during alveologenesis.

754 In our conditions, loss of *Fgfr2b* signaling in AT2s leads to a significant decrease in  
755 their proliferative capacity using the alveolosphere assay. This result was not  
756 observed by Liberti et al. [14]. A methodological difference that could explain these  
757 results is that a different tamoxifen regimen was used. While we primarily studied the



758 impact of *Fgfr2b* deletion on day 7 from the start of tamoxifen delivery via water,  
759 Liberti et al. treated the Exp. adult mice by oral gavage with tamoxifen for three  
760 consecutive days followed by two weeks washout period. We have also analyzed the  
761 lungs after a two-week (Figure S6) or eight-week (Figure S7) chase period. We  
762 observed increased proliferation and apoptosis in Tom<sup>Pos</sup> cells at both time points,  
763 indicating the establishment of another homeostatic equilibrium. RT-PCR after one  
764 week of tamoxifen water followed with a two-week chase period shows that the WT  
765 transcript is dominating in E-AT2s and E-IAAPs (Figure S6a).

766 Interestingly, we also observe increased proliferative capabilities of the E-AT2 cells in  
767 the context of one-week tamoxifen followed by an eight-week chase period compared  
768 to the one-week tamoxifen water treatment (Figure 7). However, their capacity to  
769 proliferate is nonetheless decreased compared to C-AT2s. The difference between  
770 our conditions and the ones from Liberti et al. could be due to different leakiness  
771 levels of the *Sftpc*<sup>CreERT2</sup> driver used.

772 Interestingly, Liberti et al. also reported, using IF, an increase in Edu<sup>Pos</sup> lineage-  
773 traced cells in the Exp. vs Ctrl lungs without providing a clear explanation for this  
774 controversial result. *Fgfr2b* signaling is known to control proliferation or/and survival  
775 positively. However, to our knowledge, it does not inhibit proliferation *per se*. The  
776 interpretation for this puzzling result is now clear if we consider the proliferative  
777 lineage-traced E-IAAPs and the new homeostatic equilibrium present in the Exp.  
778 lungs.

779

780 We have also reported that C-IAAPs also express Pd-l1 [19]. We found similar  
781 results for E-IAAPs (Figure S8). In the context of cancer, PD-L1 expressed by some  
782 human cancer cells binds to PD1, a checkpoint protein expressed by T cells to

783 prevent the immune cells from attacking them, allowing the cancer cells to escape  
784 the immune aggression. These cells usually display enhanced self-renewal  
785 capabilities and are considered cancer stem cells [21, 32-34]. A similar concept is  
786 emerging in the context of the IAAPs with their capacity to escape the harmful  
787 consequences of *Fgfr2b* inactivation. While these escaping properties may be  
788 beneficial in lung injury, future research should also focus on examining their role in  
789 the context of cancer. Designing dual-labeling systems such as the Dre/Rox and  
790 Cre/LoxP system [35] under the control of *Sftpc* and *Pd-1* promoter appears to be a  
791 promising strategy to specifically target the IAAPs and examine their precise  
792 contribution to the AT2 lineage in the context of repair after injury, regeneration or  
793 even cancer.

794 In conclusion, we have identified IAAPs as a potentially novel population of AT2  
795 progenitors necessary for alveolar repair after massive injury to mature AT2s.  
796 Understanding how IAAPs get activated to proliferate and differentiate into mature  
797 AT2s will be critical to designing efficient strategies to treat debilitating lung diseases.

798

799

800

801 **DECLARATIONS**

802

803

804 **Ethics approval**

805 All animal studies were performed according to protocols approved by the Animal  
806 Ethics Committee of the Regierungspraesidium Giessen (permit numbers: G7/2017–  
807 No.844-GP and G11/2019–No. 931-GP).

808

809 **Consent for publication**

810 All authors reviewed the results and contributed to the final manuscript. All authors  
811 approved this manuscript for publication.

812

813 **Availability of data and material**

814 The scRNA-seq data are currently been deposited in GEO (accession number GSE  
815 pending). Genearrays data have been been deposited in GEO (accession number  
816 GSE162588).

817

818 **Competing interests**

819 All the authors declare no competing interest

820

821 **Funding**

822 S.B. was supported by grants from the Deutsche Forschungsgemeinschaft (DFG;  
823 BE4443/1-1, BE4443/4-1, BE4443/6-1, KFO309 P7, 284237345 and SFB1213-  
824 projects A02 and A04), UKGM, Universities of Giessen and Marburg Lung Center  
825 (UGMLC), DZL. J.S.Z was funded through a start-up package from Wenzhou Medical  
826 University and the National Natural Science Foundation of China (grant number  
827 81472601). S.H. was supported by the UKGM (FOKOOV), the DZL and University  
828 Hospital Giessen and grants from the DFG (KFO309 P2/8, 284237345; SFB1021  
829 C05, SFB TR84 B9). DAA acknowledges support from NHLBI (R01HL141856). N.A.  
830 was funded through a start-up grant from the Cardio-Pulmonary Institute.

831

832 **Authors' contribution**

833 N.A. designed the study, carried out the experiments, analyzed the data and wrote  
834 the manuscript. AL contributed to the experiments and quantification analysis. F.K.  
835 contributed to performing experiments, data analysis and writing of the manuscript.

836 A.I.V.A. contributed to the experiments and quantification analysis. S.R contributed to  
837 the experiments and provided feedback in the writing of the manuscript. J.W. and  
838 J.K. contributed to the experiments and data analysis. S.H., G.B., J.Z, C.S. and  
839 D.A.A. provided feedback, helped shape the research, discussed the results, and  
840 contributed to the final manuscript. S.B. designed the project, regularly monitored the  
841 generated results, interpreted the results and wrote the manuscript in coordination  
842 with N.A. All authors reviewed the results and contributed to the final manuscript.

843

844

#### 845 **Acknowledgements**

846 We thank Stefan Guenther (Bioinformatics and deep sequencing platform at the Max  
847 Planck Institute for Heart and Lung) for help in ATAC-seq data analysis. We also  
848 thank Kerstin Goth for the animal husbandry and genotyping of the mice.

849

850

851

852

853

854

## 855 REFERENCES

- 856 1 Ornitz, D. M. (2001). Regulation of chondrocyte growth and differentiation by  
857 fibroblast growth factor receptor 3. *Novartis Found Symp*, 232, 63-76;  
858 discussion 76-80, 272-282. doi:10.1002/0470846658.ch6
- 859 2 Ornitz, D. M., Xu, J., Colvin, J. S., McEwen, D. G., MacArthur, C. A., Coulier,  
860 F., . . . Goldfarb, M. (1996). Receptor specificity of the fibroblast growth factor  
861 family. *J Biol Chem* 271: 15292-15297. doi:10.1074/jbc.271.25.15292
- 862 3 Powers, C. J., McLeskey, S. W., & Wellstein, A. (2000). Fibroblast growth  
863 factors, their receptors and signaling. *Endocr Relat Cancer* 7:165-197.  
864 doi:10.1677/erc.0.0070165
- 865 4 De Moerlooze, L., Spencer-Dene, B., Revest, J. M., Hajihosseini, M.,  
866 Rosewell, I., & Dickson, C. (2000). An important role for the IIIb isoform of  
867 fibroblast growth factor receptor 2 (FGFR2) in mesenchymal-epithelial  
868 signalling during mouse organogenesis. *Development* 127: 483-492.  
869 Retrieved from <https://www.ncbi.nlm.nih.gov/pubmed/10631169>
- 870 5 El Agha, E., & Bellusci, S. (2014). Walking along the Fibroblast Growth Factor  
871 10 Route: A Key Pathway to Understand the Control and Regulation of  
872 Epithelial and Mesenchymal Cell-Lineage Formation during Lung  
873 Development and Repair after Injury. *Scientifica (Cairo)*, 2014, 538379.  
874 doi:10.1155/2014/538379
- 875 6 El Agha, E., Kosanovic, D., Schermuly, R. T., & Bellusci, S. (2016). Role of  
876 fibroblast growth factors in organ regeneration and repair. *Semin Cell Dev*  
877 *Biol*, 53: 76-84. doi:10.1016/j.semcd.2015.10.009
- 878 7 Yuan, T., Volckaert, T., Chanda, D., Thannickal, V. J., & De Langhe, S. P.  
879 (2018). Fgf10 Signaling in Lung Development, Homeostasis, Disease, and  
880 Repair After Injury. *Front Genet*, 9, 418. doi:10.3389/fgene.2018.00418
- 881 8 Bellusci, S., Grindley, J., Emoto, H., Itoh, N., & Hogan, B. L. (1997). Fibroblast  
882 growth factor 10 (FGF10) and branching morphogenesis in the embryonic  
883 mouse lung. *Development* 124: 4867-4878. Retrieved from  
884 <https://www.ncbi.nlm.nih.gov/pubmed/9428423>
- 885 9 Abler, L. L., Mansour, S. L., & Sun, X. (2009). Conditional gene inactivation  
886 reveals roles for Fgf10 and Fgfr2 in establishing a normal pattern of epithelial

- 887 branching in the mouse lung. *Dev Dyn* 238: 1999-2013.  
888 doi:10.1002/dvdy.22032
- 889 10 del Moral, P. M., De Langhe, S. P., Sala, F. G., Veltmaat, J. M., Tefft, D.,  
890 Wang, K., . . . Bellusci, S. (2006). Differential role of FGF9 on epithelium and  
891 mesenchyme in mouse embryonic lung. *Dev Biol* 293: 77-89.  
892 doi:10.1016/j.ydbio.2006.01.020
- 893 11 Sekine, K., Ohuchi, H., Fujiwara, M., Yamasaki, M., Yoshizawa, T., Sato, T., . .  
894 . Kato, S. (1999). Fgf10 is essential for limb and lung formation. *Nat Genet* 21:  
895 138-141. doi:10.1038/5096
- 896 12 Jones, M. R., Dilai, S., Lingampally, A., Chao, C. M., Danopoulos, S., Carraro,  
897 G., . . . Bellusci, S. (2018). A Comprehensive Analysis of Fibroblast Growth  
898 Factor Receptor 2b Signaling on Epithelial Tip Progenitor Cells During Early  
899 Mouse Lung Branching Morphogenesis. *Front Genet* 9: 746.  
900 doi:10.3389/fgene.2018.00746
- 901 13 Jones, M. R., Lingampally, A., Wu, J., Sedighi, J., Ahmadvand, N., Wilhelm,  
902 J., . . . Chao, C. M. (2020). Evidence for Overlapping and Distinct Biological  
903 Activities and Transcriptional Targets Triggered by Fibroblast Growth Factor  
904 Receptor 2b Signaling between Mid- and Early Pseudoglandular Stages of  
905 Mouse Lung Development. *Cells*, 9 doi:10.3390/cells9051274
- 906 14 Liberti, D. C., Kremp, M. M., Liberti, W. A., 3rd, Penkala, I. J., Li, S., Zhou, S.,  
907 & Morrissey, E. E. (2021). Alveolar epithelial cell fate is maintained in a spatially  
908 restricted manner to promote lung regeneration after acute injury. *Cell Rep* 35:  
909 109092. doi:10.1016/j.celrep.2021.109092
- 910 15 Moiseenko, A., Vazquez-Armendariz, A. I., Kheirollahi, V., Chu, X., Tata, A.,  
911 Rivetti, S., . . . El Agha, E. (2020). Identification of a Repair-Supportive  
912 Mesenchymal Cell Population during Airway Epithelial Regeneration. *Cell Rep*  
913 33:108549. doi:10.1016/j.celrep.2020.108549
- 914 16 Volckaert, T., Dill, E., Campbell, A., Tiozzo, C., Majka, S., Bellusci, S., & De  
915 Langhe, S. P. (2011). Parabronchial smooth muscle constitutes an airway  
916 epithelial stem cell niche in the mouse lung after injury. *J Clin Invest* 121:  
917 4409-4419. doi:10.1172/JCI58097
- 918 17 Gupte, V. V., Ramasamy, S. K., Reddy, R., Lee, J., Weinreb, P. H., Violette,  
919 S. M., . . . Bellusci, S. (2009). Overexpression of fibroblast growth factor-10  
920 during both inflammatory and fibrotic phases attenuates bleomycin-induced

- 921 pulmonary fibrosis in mice. *Am J Respir Crit Care Med* 180: 424-436.  
922 doi:10.1164/rccm.200811-1794OC
- 923 18 MacKenzie, B., Henneke, I., Hezel, S., Al Alam, D., El Agha, E., Chao, C. M., .  
924 . . Bellusci, S. (2015). Attenuating endogenous Fgfr2b ligands during  
925 bleomycin-induced lung fibrosis does not compromise murine lung repair. *Am*  
926 *J Physiol Lung Cell Mol Physiol*, 308: L1014-1024.  
927 doi:10.1152/ajplung.00291.2014
- 928 19 Ahmadvand, N., Khosravi, F., Lingampally, A., Wasnick, R., Vazquez-  
929 Armendariz, I., Carraro, G., . . . Bellusci, S. (2021). Identification of a novel  
930 subset of alveolar type 2 cells enriched in PD-L1 and expanded following  
931 pneumonectomy. *Eur Respir J*. doi:10.1183/13993003.04168-2020
- 932 20 Barkauskas, C. E., Cronce, M. J., Rackley, C. R., Bowie, E. J., Keene, D. R.,  
933 Stripp, B. R., . . . Hogan, B. L. (2013). Type 2 alveolar cells are stem cells in  
934 adult lung. *J Clin Invest* 123: 3025-3036. doi:10.1172/JCI68782
- 935 21 Desai, T. J., Brownfield, D. G., & Krasnow, M. A. (2014). Alveolar progenitor  
936 and stem cells in lung development, renewal and cancer. *Nature* 507: 190-  
937 194. doi:10.1038/nature12930
- 938 22 Al Alam, D., El Agha, E., Sakurai, R., Kheirollahi, V., Moiseenko, A.,  
939 Danopoulos, S., . . . Bellusci, S. (2015). Evidence for the involvement of  
940 fibroblast growth factor 10 in lipofibroblast formation during embryonic lung  
941 development. *Development* 142: 4139-4150. doi:10.1242/dev.109173
- 942 23 McQualter, J. L., McCarty, R. C., Van der Velden, J., O'Donoghue, R. J.,  
943 Asselin-Labat, M. L., Bozinovski, S., & Bertoncello, I. (2013). TGF-beta  
944 signaling in stromal cells acts upstream of FGF-10 to regulate epithelial stem  
945 cell growth in the adult lung. *Stem Cell Res* 11: 1222-1233.  
946 doi:10.1016/j.scr.2013.08.007
- 947 24 Taghizadeh, S., Heiner, M., Wilhelm, J., Herold, S., Chen, C., Zhang, J. S., &  
948 Bellusci, S. (2021). Characterization in mice of the stromal niche maintaining  
949 AT2 stem cell proliferation in homeostasis and disease. *Stem Cells*.  
950 doi:10.1002/stem.3423
- 951 25 Friedrich, G., & Soriano, P. (1991). Promoter traps in embryonic stem cells: a  
952 genetic screen to identify and mutate developmental genes in mice. *Genes*  
953 *Dev*, 5(9), 1513-1523. doi:10.1101/gad.5.9.1513

- 954 26 Hendrickson, D. G., Soifer, I., Wranik, B. J., Kim, G., Robles, M., Gibney, P.  
955 A., & Mclsaac, R. S. (2018). A new experimental platform facilitates  
956 assessment of the transcriptional and chromatin landscapes of aging yeast.  
957 *Elife* 7. doi:10.7554/eLife.39911
- 958 27 Jones, M., Chong, L., Limgapally, A. R., Wilhelm, J., Ansari, M., Schiller, H. B.,  
959 . . . Bellusci, S. (2022). Characterization of alveolar epithelial lineage  
960 heterogeneity during the late pseudoglandular stage of mouse lung  
961 development. *BIORXIV-2022-475053v1*, 83.
- 962 28 Treutlein, B., Brownfield, D. G., Wu, A. R., Neff, N. F., Mantalas, G. L.,  
963 Espinoza, F. H., . . . Quake, S. R. (2014). Reconstructing lineage hierarchies  
964 of the distal lung epithelium using single-cell RNA-seq. *Nature* 509: 371-375.  
965 doi:10.1038/nature13173
- 966 29 Dorry, S. J., Ansbro, B. O., Ornitz, D. M., Mutlu, G. M., & Guzy, R. D. (2020).  
967 FGFR2 Is Required for AEC2 Homeostasis and Survival after Bleomycin-  
968 induced Lung Injury. *Am J Respir Cell Mol Biol* 62: 608-621.  
969 doi:10.1165/rcmb.2019-0079OC
- 970 30 Zhang, Z., Newton, K., Kummerfeld, S. K., Webster, J., Kirkpatrick, D. S., Phu,  
971 L., . . . Dixit, V. M. (2017). Transcription factor Etv5 is essential for the  
972 maintenance of alveolar type II cells. *Proc Natl Acad Sci U S A* 114:3903-  
973 3908. doi:10.1073/pnas.1621177114
- 974 31 Herriges, J. C., Verheyden, J. M., Zhang, Z., Sui, P., Zhang, Y., Anderson, M.  
975 J., . . . Sun, X. (2015). FGF-Regulated ETV Transcription Factors Control  
976 FGF-SHH Feedback Loop in Lung Branching. *Dev Cell* 35: 322-332.  
977 doi:10.1016/j.devcel.2015.10.006
- 978 32 Lin, C., Song, H., Huang, C., Yao, E., Gacayan, R., Xu, S. M., & Chuang, P. T.  
979 (2012). Alveolar type II cells possess the capability of initiating lung tumor  
980 development. *PLoS One* 7:e53817. doi:10.1371/journal.pone.0053817
- 981 33 Sutherland, K. D., & Berns, A. (2010). Cell of origin of lung cancer. *Mol Oncol*  
982 4:397-403. doi:10.1016/j.molonc.2010.05.002
- 983 34 Xu, X., Rock, J. R., Lu, Y., Futtner, C., Schwab, B., Guinney, J., . . . Onaitis,  
984 M. W. (2012). Evidence for type II cells as cells of origin of K-Ras-induced  
985 distal lung adenocarcinoma. *Proc Natl Acad Sci U S A* 109:4910-4915.  
986 doi:10.1073/pnas.1112499109



987 35 Jones, M., Zhang, J. S., & Bellusci, S. (2019). Bronchioalveolar stem cells  
988 vindicated. *Biotarget 3: 4*. doi:10.21037/biotarget.2019.04.01  
989  
990

991 **Figure captions**

992

993

994

**Fig. 1 IAAP and AT2 subpopulations respond differently to *Fgfr2b* deletion**

995 **a)** Timeline of tamoxifen treatment of *Sftpc*<sup>CreERT2/+</sup>; *Fgfr2b*<sup>+/+</sup>; *tdTom*<sup>flox/flox</sup> mice (n=4).

996 Flow cytometry plots represent the detection of C-IAAP, C-AT2 subpopulations

997 based on the tdTomato level in Ctrl lungs. The pie chart shows the percentage of C-

998 IAAPs, C-AT2s in total tdTomato positive cells in the Ctrl group. **b)** Timeline of

999 tamoxifen treatment of *Sftpc*<sup>CreERT2/+</sup>; *Fgfr2b*<sup>flox/flox</sup>; *tdTom*<sup>flox/flox</sup> mice (n=4). Flow

1000 cytometry plots represent the detection of E-IAAPs, E-AT2s based on the tdTomato

1001 level in Exp. lungs. The pie chart shows the percentage of E-IAAPs, E-AT2s in total

1002 tdTomato positive cells in the Exp. group. **c)** RT-PCR for detecting the *Fgfr2b* mutant

1003 transcript in FACS-based sorted C-IAAPs, C-AT2s, E-IAAPs and E-AT2s. Wild type

1004 and mutant forms are detected by the size of 340bp and 195bp, respectively. **d)**

1005 qPCR analysis of FACS-based sorted C-IAAPs and C-AT2s **.e)** qPCR analysis of

1006 FACS-based sorted E-IAAPs and E-AT2s. Data are presented as mean values  $\pm$

1007 SEM. \*p < 0.05, \*\*p < 0.01, \*\*\*p < 0.001

1008

1009 **Fig. 2 Gene arrays comparing C-AT2s, C-IAAPs and E-IAAPs. a)** heatmap for the

1010 cell cycle genes indicating up-regulation of cell cycle genes in E-IAAP. **b)** heatmap

1011 for the Fgf10 signature at E12.5 indicating increased Fgf signaling in E-IAAPs. **c)**

1012 Heatmap for the AT2 signature supporting the increased commitment of the E-IAAPs

1013 towards the AT2 lineage

1014

1015 **Fig. 3 *Fgfr2b* inactivation in the AT2 lineage leads to the loss of *Fgfr2b***

1016 **signaling in AT2s and activation of *Fgfr2b* signaling in IAAPs**

1017 **a)** Timeline of tamoxifen treatment of *Sftpc*<sup>CreERT2/+</sup>; *Fgfr2b*<sup>+/+</sup>; *tdTom*<sup>flox/flox</sup> and  
1018 *Sftpc*<sup>CreERT2/+</sup>; *Fgfr2b*<sup>flox/flox</sup>; *tdTom*<sup>flox/flox</sup> mice (n=4). **b)** qPCR gene expression  
1019 analysis of FACS-based sorted C-AT2s and E-AT2s. **c)** qPCR gene expression  
1020 analysis of FACS-based sorted C- IAAPs and E- IAAPs. **d)** Immunofluorescence  
1021 staining against Fgfr2 on cytopins of C-AT2s, E-AT2s and C-IAAPs, E-IAAPs (Scale  
1022 bar: 50µm). **e)** Sftpc Immunofluorescent staining on cytopins of C-AT2s, E-AT2s and  
1023 C-IAAPs, E-IAAPs (n=4) (Scale bar: 50µm). Data are presented as mean values ±  
1024 SEM. \*p < 0.05, \*\*p < 0.01, \*\*\*p < 0.001

1025

1026 **Fig. 4 Continuous deletion of the *Fgfr2b* allele in AT2 cells and amplification of**  
1027 **IAAP cells**

1028 **a)** Schematic of Fgfr2b protein structure, coding mRNA and DNA. Wild type *Fgfr2b*  
1029 transcript consists of exon 7, exon 8 and exon 10, which is detected by the band size  
1030 of 340bp, and mutant *Fgfr2b* form (exon 8 deleted) is detectable by the band size of  
1031 195bp. **b)** RT-PCR for detecting WT and *Fgfr2b* mutant transcripts in FACS-based  
1032 sorted C-IAAPs, C-AT2s, E-IAAPs and E-AT2s on day 7 and day 14. **c)** Pie charts  
1033 represent qPCR data for deleted exon 8 (mutated Fgfr2b locus) vs exon 7 (reflecting  
1034 the intact *Fgfr2* locus) to detect the relative extent of the mutated and wild type  
1035 *Fgfr2b* locus in E-IAAPs vs C-IAAPs and E-AT2s vs C-AT2s at two time points

1036

1037 **Fig. 5 Reduction of tdTomato<sup>Pos</sup> cells along with enhanced apoptosis and**  
1038 **proliferation in *Fgfr2b*-cKO**

1039 **a)** Tamoxifen treatment timeline of *Sftpc*<sup>CreERT2/+</sup>; *Fgfr2b*<sup>+/+</sup>; *tdTomato*<sup>flox/flox</sup> and  
1040 *Sftpc*<sup>CreERT2/+</sup>; *Fgfr2b*<sup>flox/flox</sup>; *tdTomato*<sup>flox/flox</sup> mice. **b)** Flow cytometry analysis of the  
1041 percentage of tdTomato<sup>Pos</sup> cells in Ctrl and Exp. on day 7 and day 14. Note the

1042 expansion of the E-IAAPs as well as the decrease in tdTom+/Epcam+ in Exp. lungs.  
1043 **c)** Representative Sftpc immunofluorescence staining (Scale bar: 50µm).  
1044 Quantification of tdTomato+, Sftpc+ single positive and tdTomato+ Sftpc+ double-  
1045 positive cells at day 7 and day 14 (n=4). **d)** Representative EdU staining (Scale bar:  
1046 50µm) and quantification of tdTomato+ Edu+ cells at day 7 and day 14 (n=4). **e)**  
1047 Representative TUNEL staining and quantification of tdTomato+TUNEL+ cells on day  
1048 7 and day 14. Data are presented as mean values ± SEM. \*p < 0.05, \*\*p <  
1049 0.01, \*\*\*p < 0.001

1050

1051 **Fig. 6 Lung structure remains intact following *Fgfr2b* deletion**

1052 **a)** Timeline of tamoxifen treatment of *Sftpc*<sup>CreERT2/+</sup>; *Fgfr2b*<sup>+/+</sup>; *tdTomato*<sup>flox/flox</sup> and  
1053 *Sftpc*<sup>CreERT2/+</sup>; *Fgfr2b*<sup>flox/flox</sup>; *tdTomato*<sup>flox/flox</sup> mice. **b)** Hematoxylin and eosin staining of  
1054 the Ctrl and the Exp. lungs at day 7 (scale bar 200 and 50 µm) **c)** Morphometry  
1055 analysis (alveolar space, septal wall thickness, and MLI) of the Ctrl and the Exp.  
1056 lungs at day 7 (n=4). **d)** Hematoxylin and eosin staining of the Ctrl and the Exp. lungs  
1057 at day 14 (scale bar 200 and 50 µm). **e)** Morphometry analysis (alveolar space,  
1058 septal wall thickness, and MLI) of Ctrl and Exp. lungs at day 14 (n=4). Data are  
1059 presented as mean values ± SEM. \*p < 0.05, \*\*p < 0.01, \*\*\*p < 0.001

1060

1061 **Fig. 7 Deletion of *Fgfr2b* in the AT2 lineage leads to loss of self-renewal**  
1062 **capability in AT2 and a gain of alveolosphere formation potential in IAAPs**

1063 **a)** Representative flow cytometry shows the gating strategy of  
1064 Cd31<sup>Neg</sup>Cd45<sup>Neg</sup>Epcam<sup>Neg</sup> population and a further selection of Sca1+ resident  
1065 mesenchymal cells from C57BL/6 lungs (upper plot), as well as the selection of  
1066 IAAPs and AT2s from Epcam<sup>Pos</sup> population from *Sftpc*<sup>CreERT2/+</sup>; *Fgfr2b*<sup>+/+</sup>;

1067 *tdTomato*<sup>flox/flox</sup> (lower plot). Resident mesenchymal cells were co-cultured with IAAPs  
1068 and AT2s separately (n=3). **b)** Representative alveolospheres from AT2s and IAAPs  
1069 from Ctrl and Exp. mice (n=3), (Scale bar: 100µm) **c)** Representative Sftpc and  
1070 RAGE immunofluorescence staining of alveolospheres after 14 days in culture,  
1071 (Scale bar: 50µm). **d)** Quantification of alveolospheres size and Colony-forming unit  
1072 (CFU) in AT2s and IAAPs from Ctrl and Exp. mice (n=3). **e)** Percentile of AT2s and  
1073 IAAPs in Ctrl and Exp lungs at different time points following 7 days tamoxifen  
1074 treatment.

1075

1076 **Figure 8: Transition of IAAPs towards AT2 in response to *Fgfr2b* deletion**

1077 **a)** Representative flow cytometry analysis of *tdTomato* shows the expansion of  
1078 IAAPs towards higher *tdTomato* intensity in E-IAAPs compared to C-IAAPs. **b)**  
1079 *tdTomato* intensity quantification of IAAPs in Ctrl and *Fgfr2b*-cKO lungs. **c)** qPCR  
1080 analysis of *tdTomato* expression on FACS-based sorted IAAPs. **d)** scRNA-seq on  
1081 FACS-isolated IAAPs and AT2s 7 days following Sham surgery. UMAP clustering  
1082 indicates 6 main clusters. **e)** Expression of genes enriched in C-IAAPs vs. C-AT2s  
1083 identifies the cluster AT2-1 as the IAAPs. **f)** Expression of genes enriched in E-IAAPs  
1084 vs, C-IAAPs indicate that AT2-1/IAAPs subcluster contains activate IAAPs. **g)**  
1085 Expression of genes representing the *Fgfr2b* E14.5 signature is enriched in AT2s . **h)**  
1086 Expression of *Sftpb* is enriched in AT2s. **i)** Expression of genes representing AT2  
1087 signature is enriched in AT2s. **j)** Expression of genes representing AT1 signature is  
1088 enriched in IAAPs. **k)** Expression of *Pcna* is present in both AT2s and IAAPs. **l)**  
1089 Expression of mitochondrial DNA genes in IAAPs. Data are presented as mean  
1090 values ± SEM. \*p < 0.05, \*\*p < 0.01, \*\*\*p < 0.001.

1091

1092 **Figure 9: Schematic representation of characteristics and behavior of IAAP and**  
1093 **AT2 cells in Ctrl and *Fgfr2b*-cKO lungs.**

1094 The AT2-Tom<sup>High</sup> are the mature AT2s while the AT2-Tom<sup>Low</sup> (IAAPs) correspond to  
1095 immature AT2s. In the context of *Fgfr2b* deletion, both AT2s and IAAPs undergo  
1096 apoptosis. However, while in the AT2 pool, this apoptotic phenotype is fully  
1097 penetrant, in the IAAP pool, we observed the emergence of resistant IAAPs to *Fgfr2b*  
1098 deletion (RIAAPs). These results also suggest that the IAAP pool is itself  
1099 heterogeneous. The difference between RIAAPs and IAAPs and the mechanisms  
1100 involved in the emergence of this resistance in RIAAPs will require further  
1101 investigation. We also propose that the RIAAPs proliferate and get progressively  
1102 committed towards mature AT2s. We suggest that Fgf signaling in these cells is likely  
1103 driving this proliferation and differentiation process. Differentiated AT2 arising from  
1104 RIAAPs (DRIAAPs) are then, due to previously described leakiness of the  
1105 *Sftpc*<sup>CreERT2</sup> driver<sup>19</sup>, undergoing *Fgfr2b* deletion creating a constant cycle of  
1106 proliferative and apoptotic alveolar epithelial cells allowing to maintain AT2  
1107 homeostasis. The long-term consequences of this new equilibrium are still unclear. In  
1108 addition, how different are the DRIAAPs from bona fide AT2s is still unknown.

1109

1110

1111

1112 **Supplementary Figure captions**

1113

1114 **Fig. S1 Fgfr2b is haplosufficient in AT2s.** FACS-based approach based on Pd-I1

1115 expression to isolate AT2s and IAAPs in *Fgfr2b*<sup>+/+</sup> and *Fgfr2b*<sup>+/-</sup> lungs

1116

1117 **Fig. S2 Recombination efficiency in the IAAPs and AT2s in Exp. vs Ctrl lungs.**

1118 **a)** Ctrl and Exp. lungs were analyzed 36 hours after a single dose of Tam IP. FACS

1119 analysis was carried out to quantify the abundance of IAAPs and AT2s (out of

1120 Epcam) in Ctrl and Exp. lungs. **b)** Recombination efficiency in one-week and two-

1121 week tamoxifen treated animals. Quantification of the % of Tom<sup>Pos</sup>Sftpc<sup>Pos</sup>/Sftpc<sup>Pos</sup> by

1122 IF

1123

1124 **Fig. S3 Sequencing of the mutant transcript indicates complete deletion of**

1125 **exon 8 in E-IAAPs isolated at day 7 during tamoxifen water treatment**

1126

1127 **Fig. S4 ATAC-seq analysis of E-IAAPs and C-IAAPs suggest that IAAPs get**

1128 **activated upon *Fgfr2b* deletion.** **a)** Coverage heat maps of C-IAAPs and E-IAAPs,

1129 displaying genome-wide regions of differential open chromatin peaks in E-IAAPs vs

1130 C-IAAPs. C-IAAP chromatin is less open and transcriptionally less active compared

1131 to E-IAAPs. ATAC-seq analysis of peaks based on the cutoffs shows 56 up-

1132 regulated in C-IAAPs (FDR < 0.05, |log<sub>2</sub>(FC) > 0.585, base Mean > 20) , 455 up-

1133 regulated in E-IAAPs (FDR < 0.05, log<sub>2</sub>(FC) > 0.585, base Mean > 20) and 455 non-

1134 regulated (base Mean > 20, FDR > 0.5, log<sub>2</sub>(FC) between -0.15 and 0.15) which

1135 means 7.1% and 35.6% of the genome is differently accessible in C-IAAPs and E-

1136 IAAPs, respectively. **b)** Analysis of peaks obtained in the ATAC-seq

1137 experiment for E-IAAPs and C-IAAPs using Kobas for the Reactome  
1138 database. Peaks overlapping gene body or near the transcription starting site of  
1139 genes were annotated to the corresponding genes. All annotated peaks were split  
1140 into lists of genes that display more open chromatin in E-IAAPs or C-IAAPs using  
1141 DESeq2 on unified peak regions. Observed significance was adjusted by Benjamini-  
1142 Hochberg correction for multiple tests (FDR). The resulting lists were used as input  
1143 for Kobas to search for enriched terms in different databases. Top 7 terms were  
1144 chosen by significance (FDR < 0.2). Results indicate that the term Metabolism is  
1145 highly enriched in E-IAAPs, indicating that the chromatin of E-IAAPs is more  
1146 accessible in loci of genes (gene body or promoter) associated with metabolism.  
1147 Higher accessibility is associated with more transcriptional activity. Numbers in  
1148 brackets display the number of identified genes / total number of genes for term in  
1149 the database. DEG: Differentially expressed genes. Between brackets [ ]: Genes  
1150 found/total genes in term.

1151

1152 **Fig. S5 Viability of IAAPs and AT2s in Ctrl and *Fgfr2b*-cKO lungs following**  
1153 **FACS.** Quantification of live and dead cells of Tom<sup>Low</sup> and Tom<sup>High</sup> by  
1154 NucleoCounter, following FACS isolation from Exp. compared to Ctrl mice (n=4).  
1155 Data are presented as mean values ± SEM. \*p < 0.05, \*\*p < 0.01, \*\*\*p < 0.001.

1156

1157 **Fig. S6 Analysis of the AT2s and IAAPs in Ctrl and Exp. lung in one-week**  
1158 **tamoxifen followed by a two-week chase period**

1159 **a)** RT-PCR for detecting WT and *Fgfr2b* mutant transcripts in FACS-based sorted C-  
1160 IAAPs, C-AT2s, E-IAAPs and E-AT2s. **b)** Flow cytometry analysis indicating  
1161 expansion of the E-IAAPs as well as a global decrease in tdTom<sup>+</sup> cells/Epcam<sup>+</sup> in



1162 Exp. lungs. **c)** IF for tdTom+, Sftpc+ single positive cells as well as tdTom+ Sftpc+  
1163 double-positive cells.

1164

1165 **Fig. S7 Analysis of the AT2s and IAAPs in Ctrl and Exp. lungs in one-week**  
1166 **tamoxifen followed by an eight-week chase period. a)** IF for Edu and TUNEL  
1167 indicating a trend (non-significant) towards a residual increase in proliferation and  
1168 apoptosis. **b)** Flow cytometry analysis indicating that the percentile of E-IAAPs, even  
1169 though still higher than the one observed for C-IAAPs, is trending towards a  
1170 normalization. Note that there is no change in the number of tdTom+/Epcam+ in Exp.  
1171 and Ctrl lungs at this time point. **c)** IF for tdTom+, Sftpc+ single positive cells as well  
1172 as tdTom+ Sftpc+ double-positive cells show no difference between Ctrl and Exp.  
1173 lungs.

1174

1175 **Fig. S8 Enrichment of Pd-I1 expression in E-IAAPs vs E-AT2s. a)** Gene array for  
1176 E-AT2s and E-IAAPs collected on day 4, 7 and 14 during the tamoxifen treatment.  
1177 Note that *Cd33*, *Cd300lf* and *Cd274* (aka Pd-I1) are increased in E-IAAPs vs E-AT2s.  
1178 **b)** Validation of these results by qPCR, cytospin and flow cytometry. **c)** qPCR  
1179 indicates that *Cd33* and *Pd-I1* are enriched in E-IAAPs. **d)** Cytospin followed by IF  
1180 for Pd-I1 indicates enrichment in Pd-I1 protein expression in E-IAAPs. **e)** Flow  
1181 cytometry for E-IAAPs and E-AT2s followed by detection of Pd-I1 confirms that Pd-I1  
1182 is expressed chiefly in E-IAAPs.

1183

1184 **Supp figure for reviewers only.** Dynamic changes of IAAPs and AT2s during  
1185 fibrosis formation and resolution. a) Two month-old Sftpc<sup>CreERT2/+</sup>; TdTomato<sup>flox/flox</sup>  
1186 mice were treated with Tam IP (3 consecutive injections) and following a chase

1187 period of 7 days, were treated with saline or bleomycin. Mice were analyzed by flow  
1188 cytometry to quantify the number of IAAPs and AT2s over total Tomato at day 10, 14,  
1189 16, 21, 28 and 60. b) Saline lung display the previously reported AT2 and IAAP ratio  
1190 over tomato. c) quantification of the AT2s and IAAPs at the different time points.  
1191 Representative flow cytometry FACS plot. d) Graph summarizing the dynamic  
1192 changing in the ratio of IAAPs and AT2s during fibrosis formation and resolution,  
1193 AT2s and IAAPs evolve in opposite direction.  
1194

Figure 1\_Ahmadvand et al

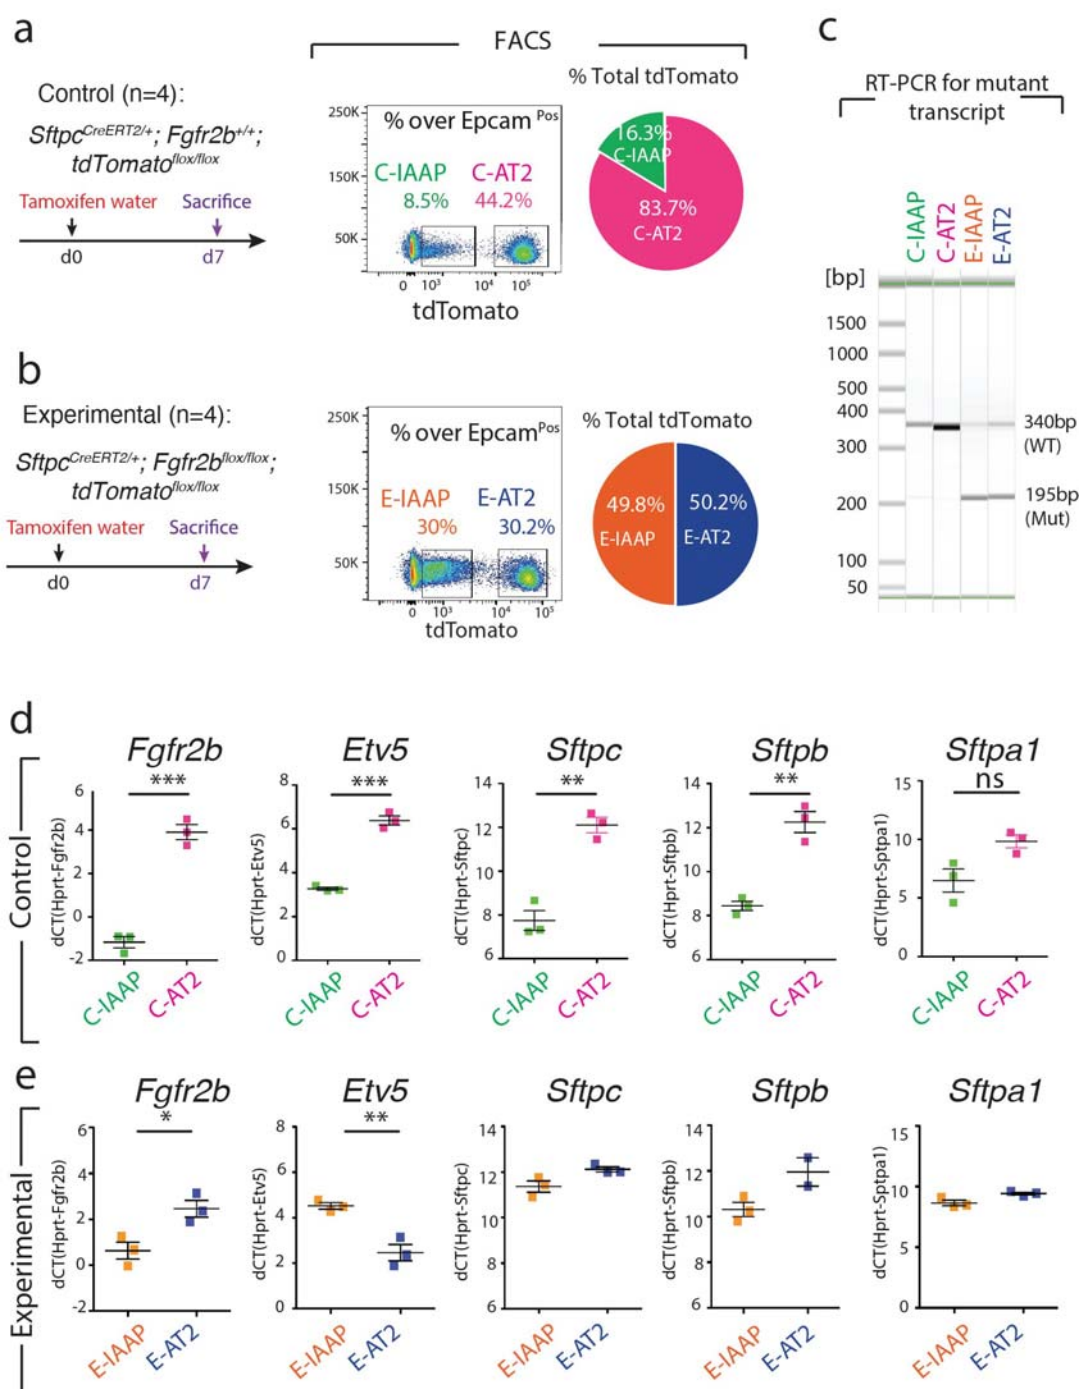



Figure 3\_Ahmadvand et al

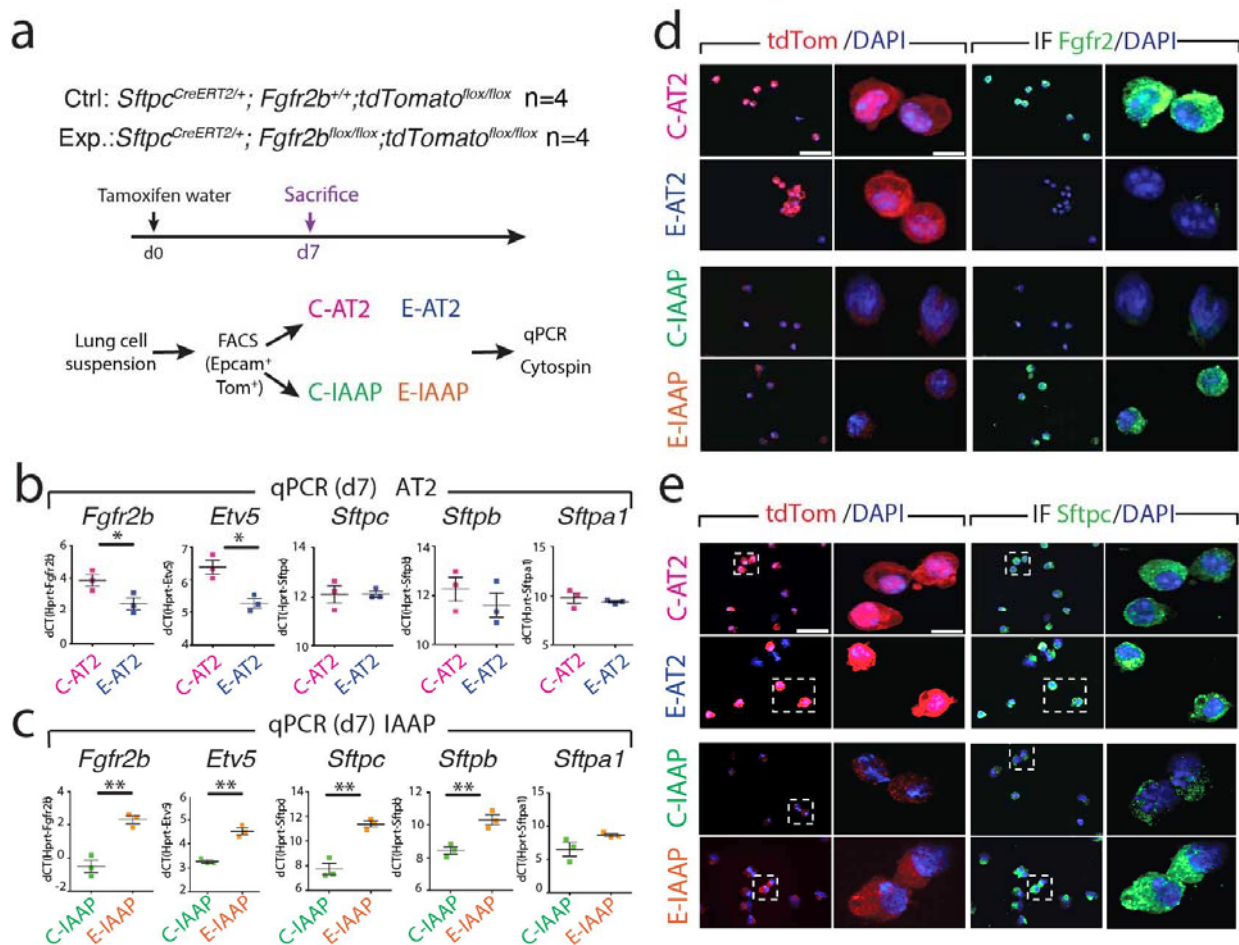

Figure 4\_Ahmadvand et al

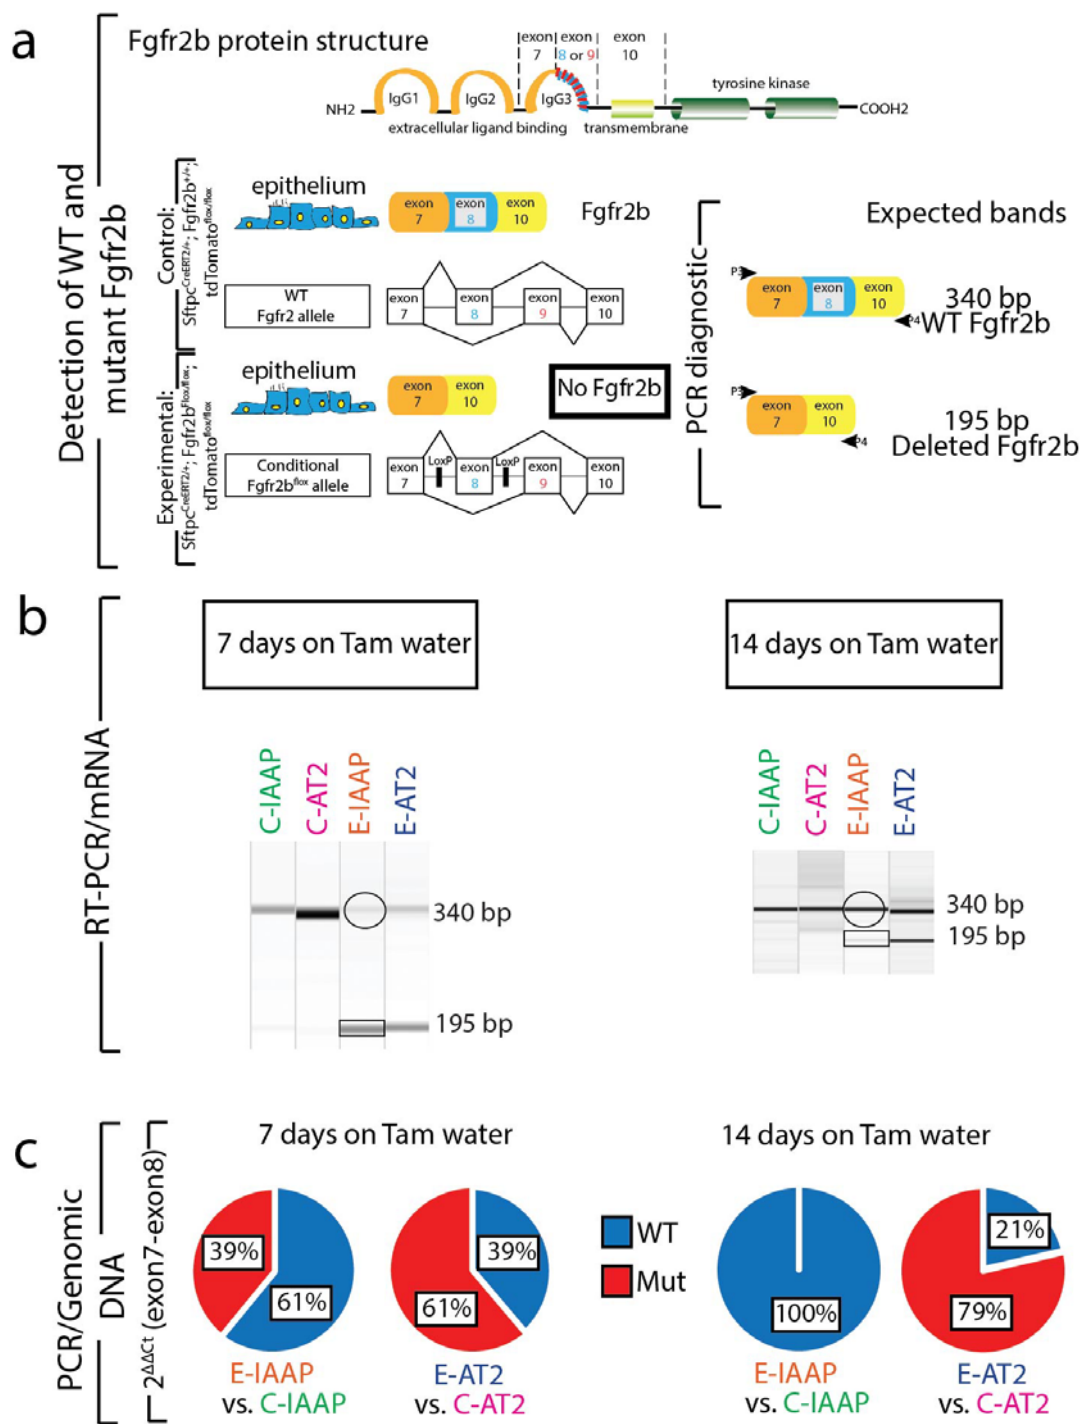



Figure 5\_Ahmadvand et al

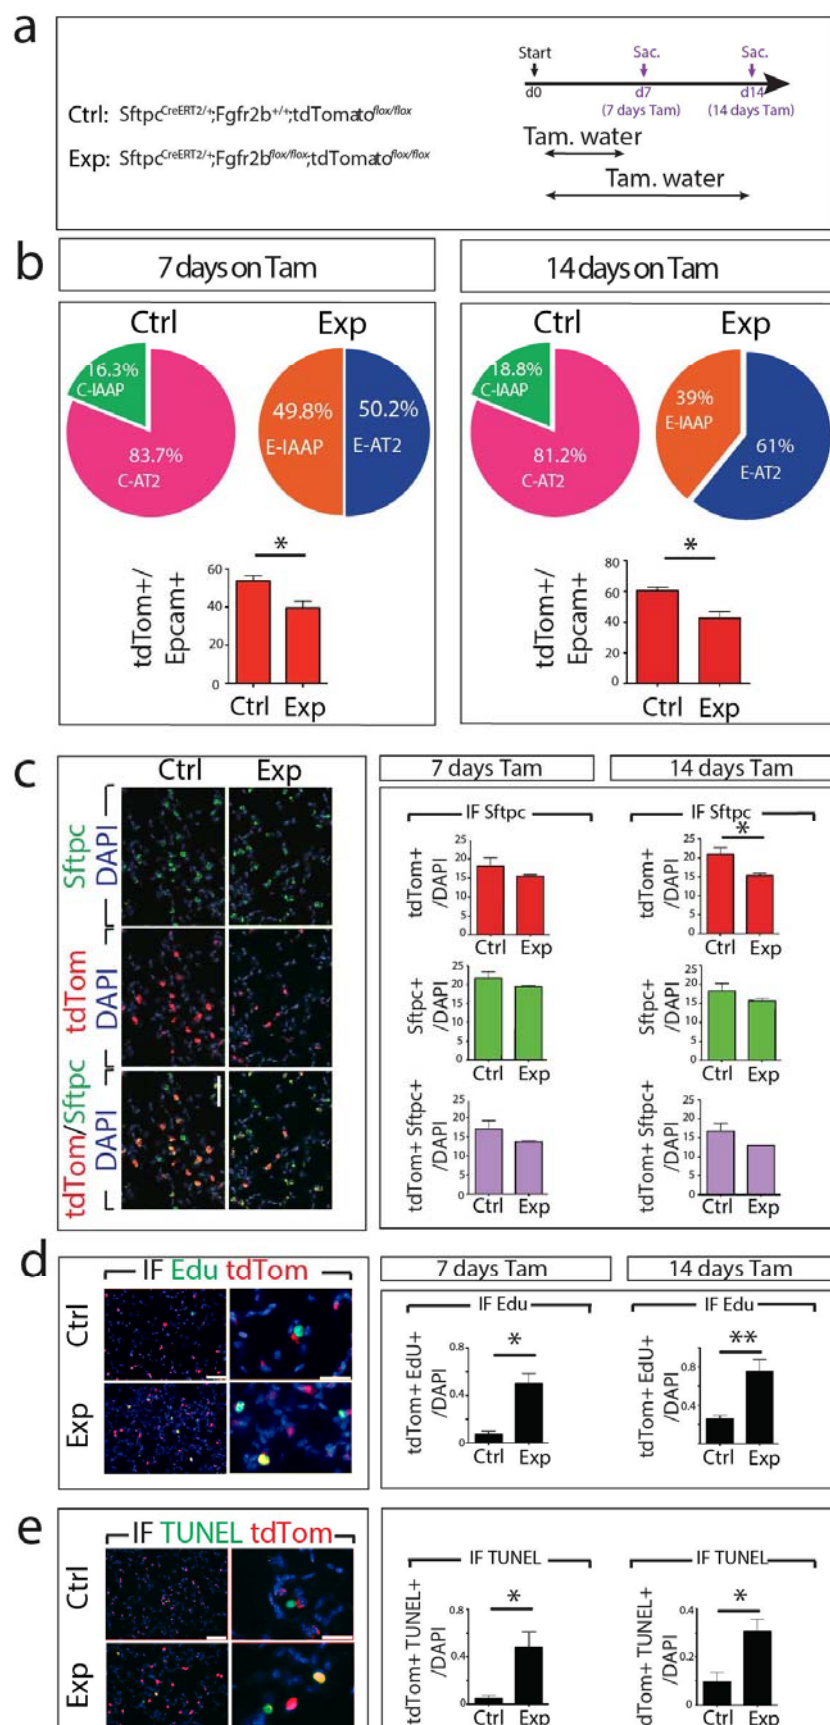

Figure 6\_Ahmadvand et al

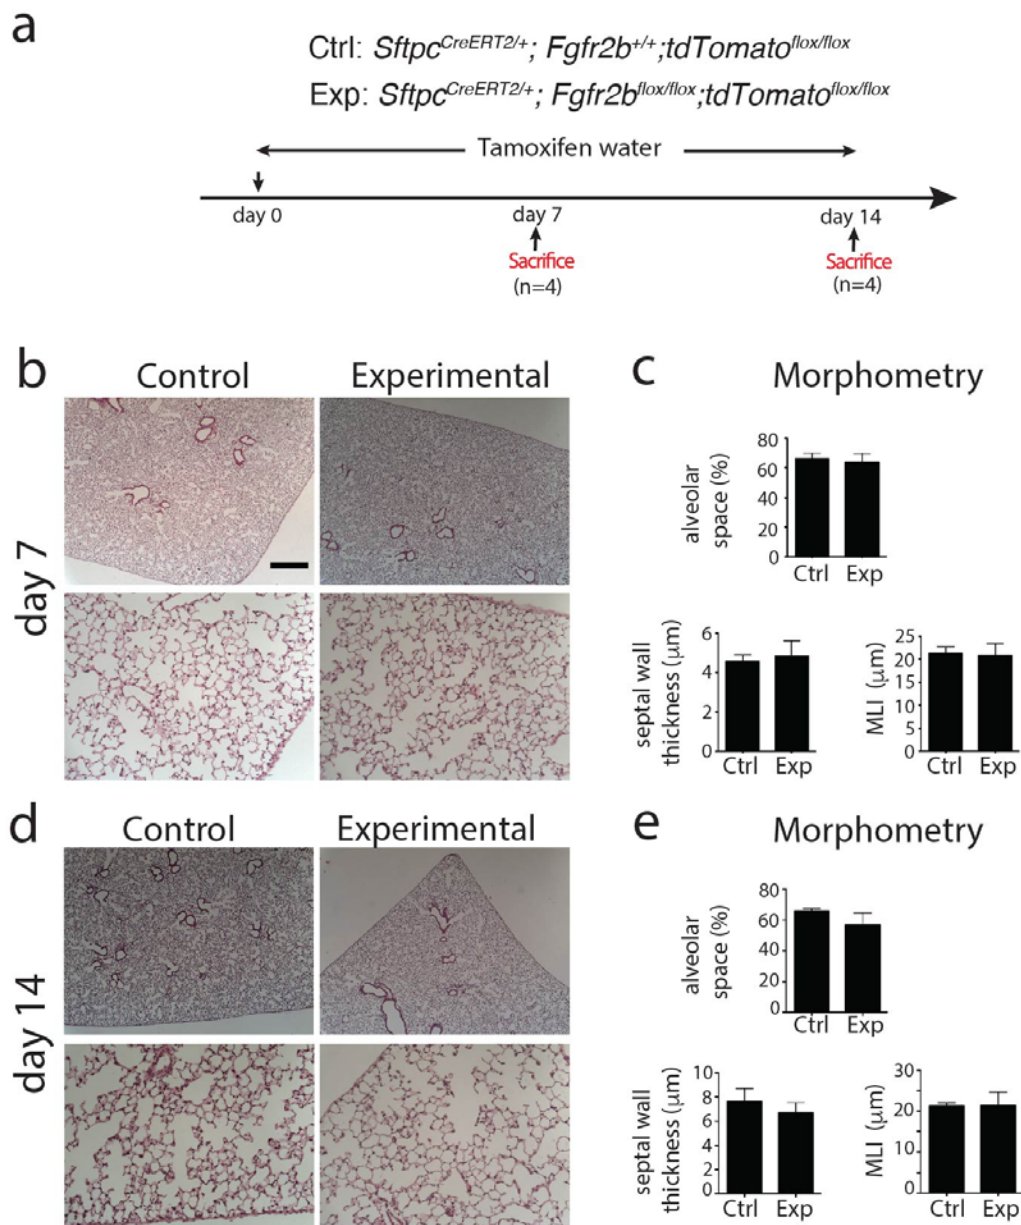



Figure 7\_Ahmadvand et al

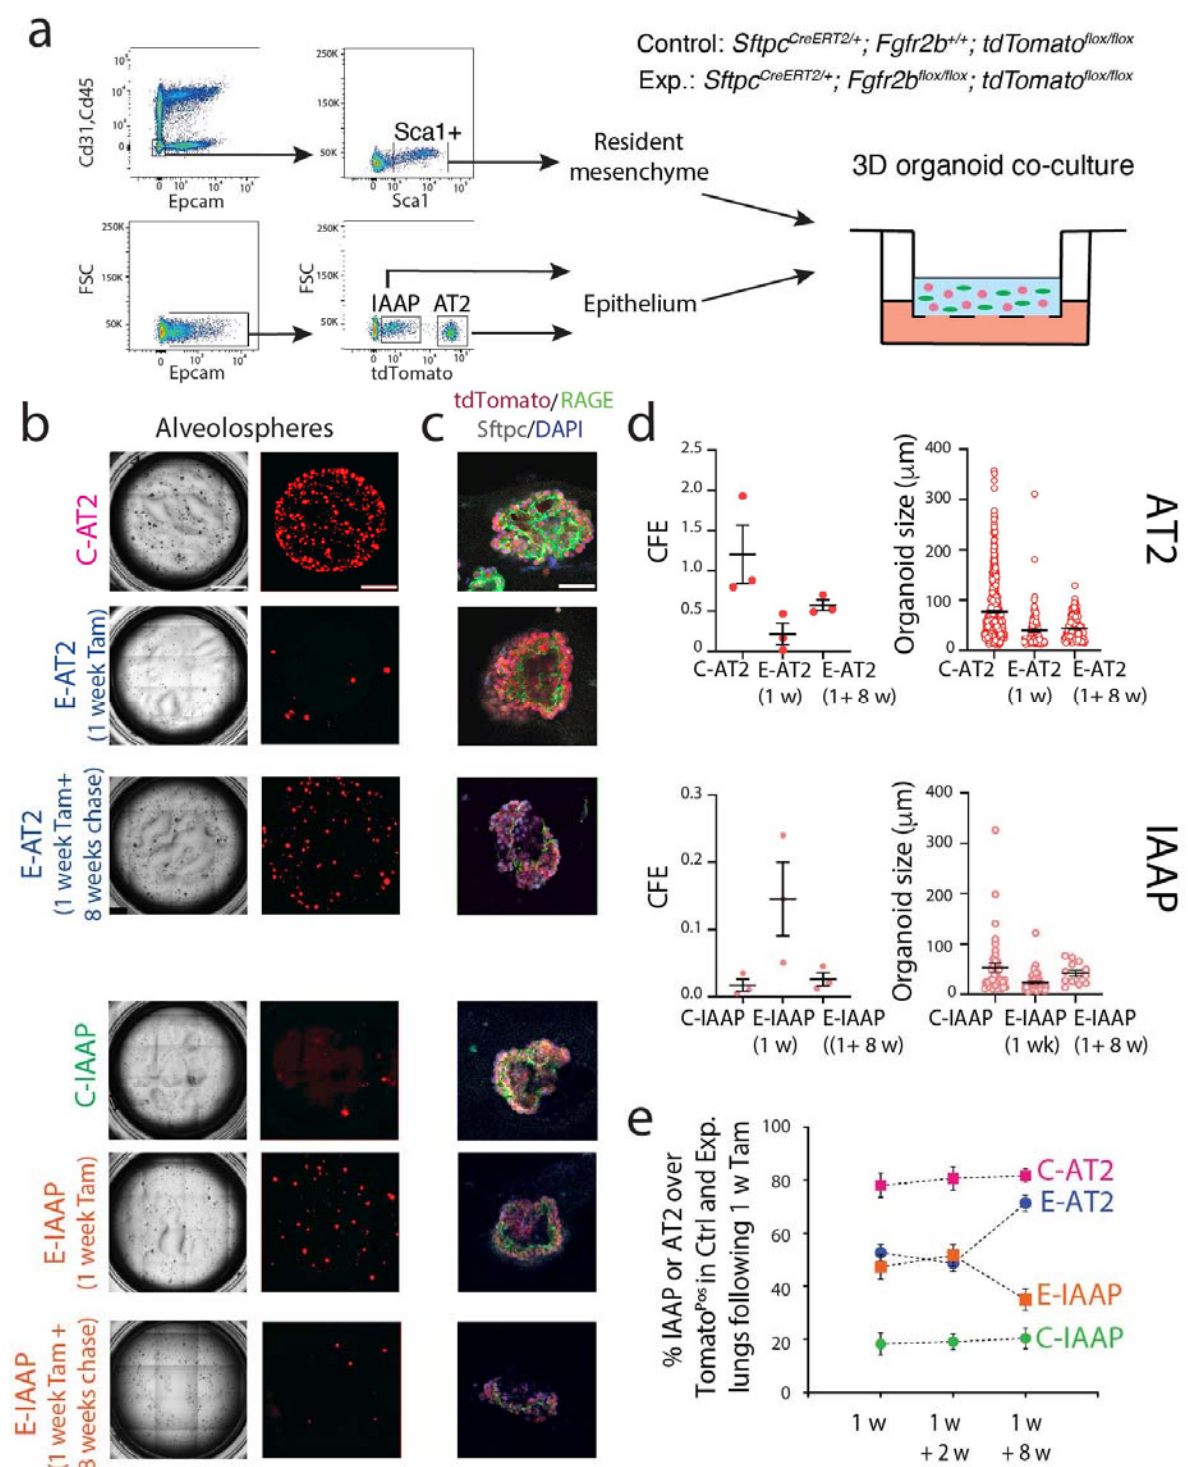

Figure 8\_Ahmadvand et al

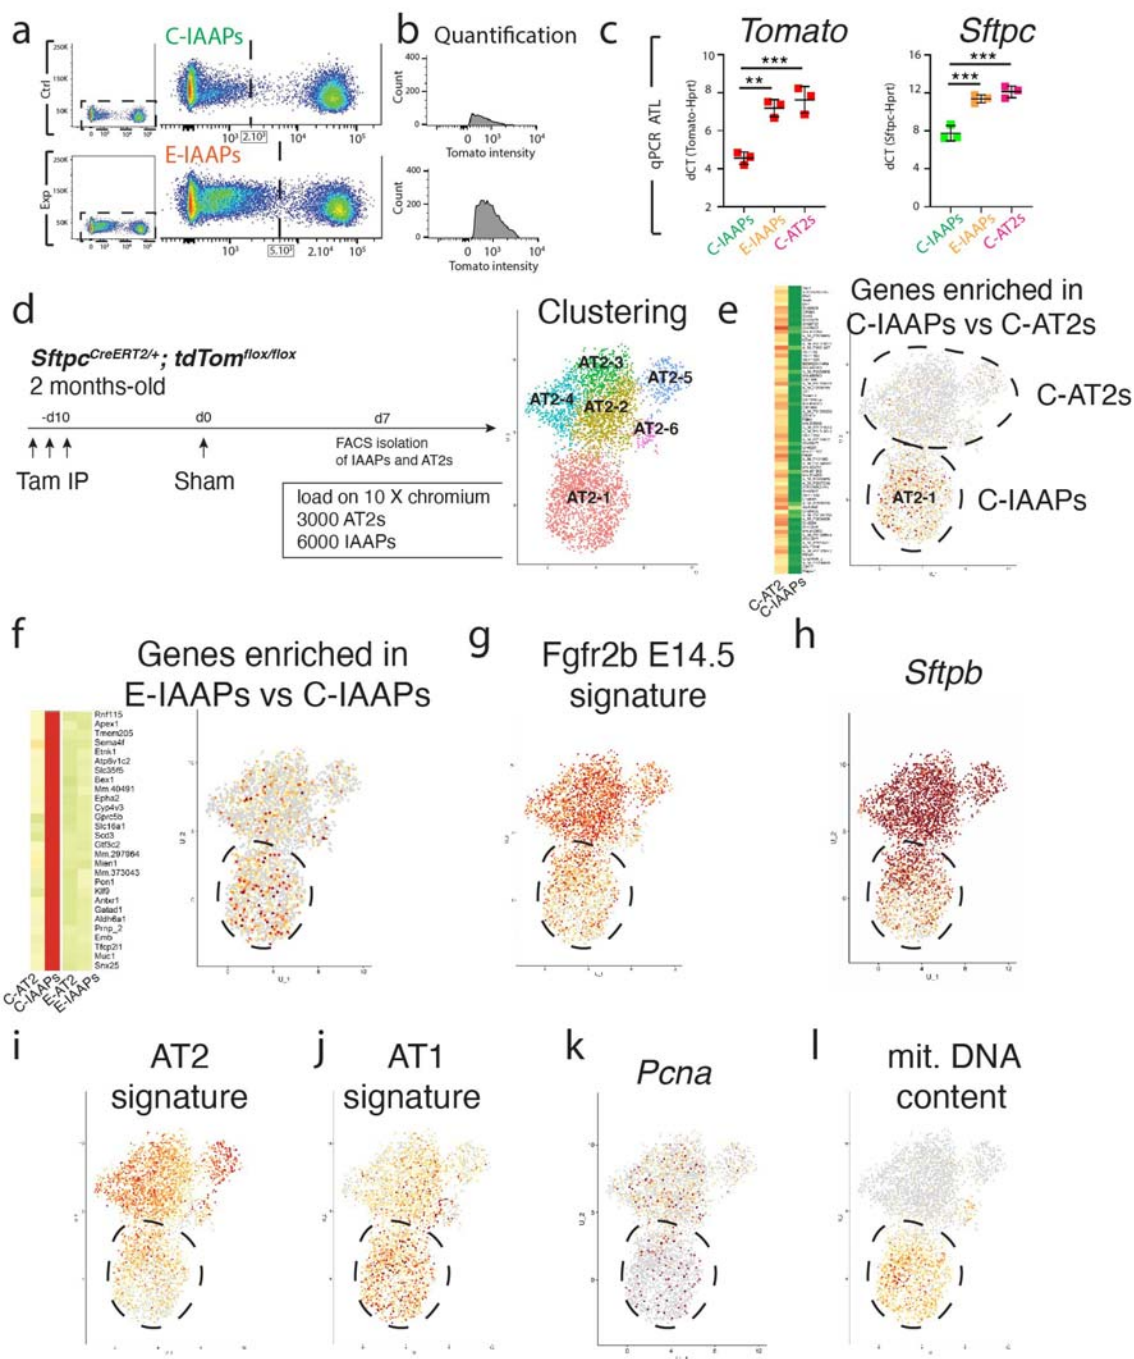

Figure 9\_Schematic/Ahmadvand et al

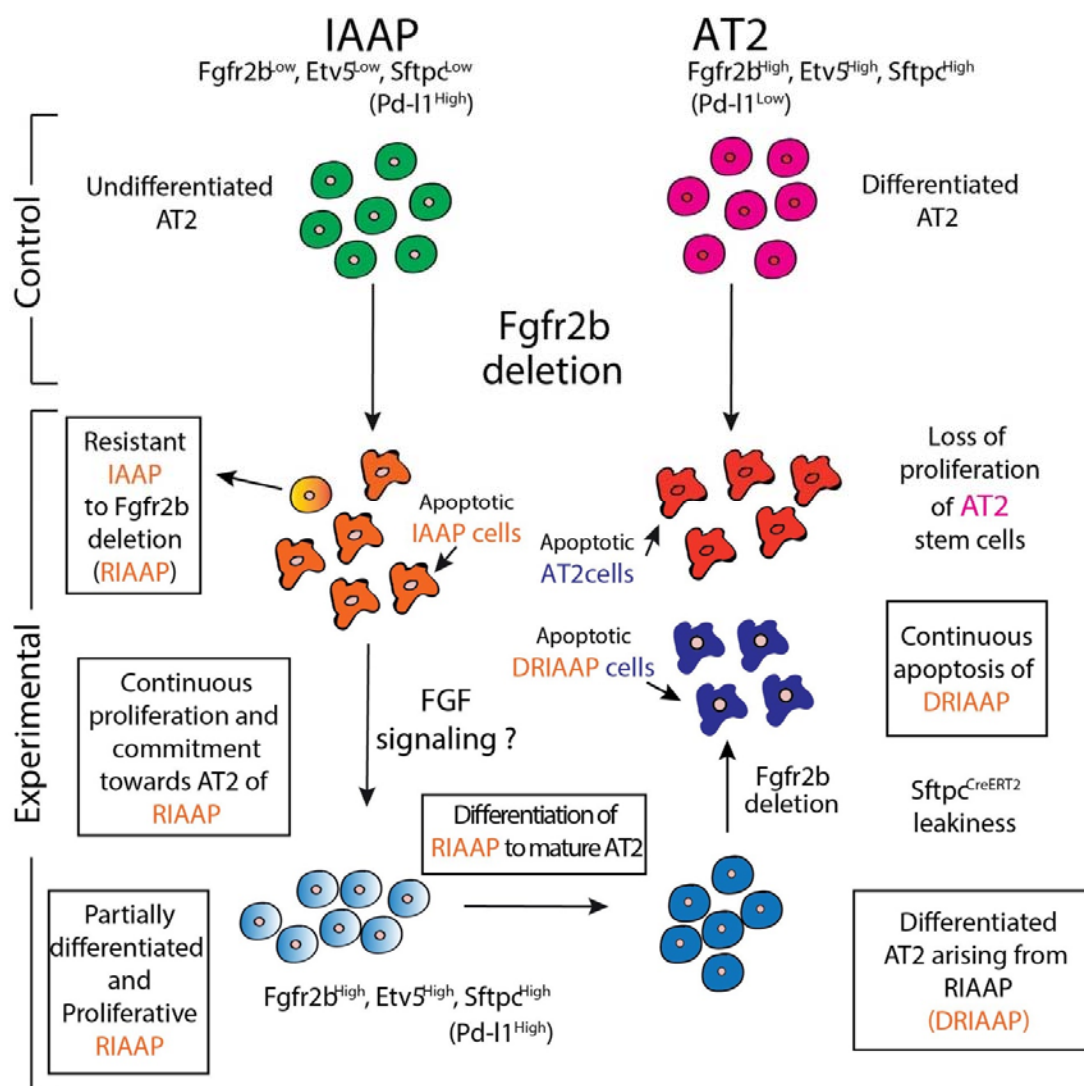

Source: https://www.biorxiv.org/content/10.1101/2022.01.26.477823v1.full.pdf
